# Supplementary material
Source: PubMed Central journal article supplement (PMC8517040)

## Supplementary Figures

# Multi-ancestry genome-wide gene-sleep interactions identify novel loci for blood pressure

Wang H, et al.

### Contents

|                                                                                                                                                                              |    |
|------------------------------------------------------------------------------------------------------------------------------------------------------------------------------|----|
| Supplementary Fig. 1. Miami plots of genome-wide gene-sleep interaction analyses in stage 1 MULTI ancestry group. ....                                                       | 2  |
| Supplementary Fig. 2. QQ plots of genome-wide gene-sleep interaction analyses in stage 1 MULTI ancestry group. ....                                                          | 3  |
| Supplementary Fig. 3. Miami plots of genome-wide gene-sleep interaction analyses in stage 1 EUR group. ....                                                                  | 4  |
| Supplementary Fig. 4. QQ plots of genome-wide gene-sleep interaction analyses in stage 1 EUR group. .                                                                        | 5  |
| Supplementary Fig. 5. Miami plots of genome-wide gene-sleep interaction analyses in stage 1 AFR group. ....                                                                  | 6  |
| Supplementary Fig. 6. QQ plots of genome-wide gene-sleep interaction analyses in stage 1 AFR group. .                                                                        | 7  |
| Supplementary Fig. 7. Regional association plots of $P_{\text{joint}}$ and $P_{\text{int}}$ for 3 replicated novel loci in stage 1+2 MULTI ancestry analyses (Table 1). .... | 8  |
| Supplementary Fig. 8. Regional association plots of $P_{\text{joint}}$ and $P_{\text{int}}$ for 3 novel loci in stage 1 AFR analyses (Supplementary Table 8). ....           | 9  |
| Supplementary Fig. 9. Miami plots of genome-wide gene-sleep interaction analyses in stage 1+2 MULTI ancestry group. ....                                                     | 10 |
| Supplementary Fig. 10. QQ plots of genome-wide gene-sleep interaction analyses in stage 1+2 MULTI ancestry group. ....                                                       | 11 |
| Supplementary Fig. 11. Miami plots of genome-wide gene-sleep interaction analyses in stage 1+2 EUR group. ....                                                               | 12 |
| Supplementary Fig. 12. QQ plots of genome-wide gene-sleep interaction analyses in stage 1+2 EUR group. ....                                                                  | 13 |
| Supplementary Fig. 13. Regional association plots of $P_{\text{joint}}$ and $P_{\text{int}}$ for 20 novel loci in stage 1+2 analyses (Supplementary Table 10). ....          | 14 |

### Supplementary Fig. 1. Miami plots of genome-wide gene-sleep interaction analyses in stage 1 MULTI ancestry group.

Upper panel are results without adjusting for BMI, lower panel are results adjusted for BMI. The minimum p-values across four BP traits were used to generate each plot. The orange points correspond to significant loci ( $P < 5 \times 10^{-8}$ ) overlapped with previously reported BP loci (distance  $< 1\text{Mb}$ ), and the red points correspond to novel significant loci.

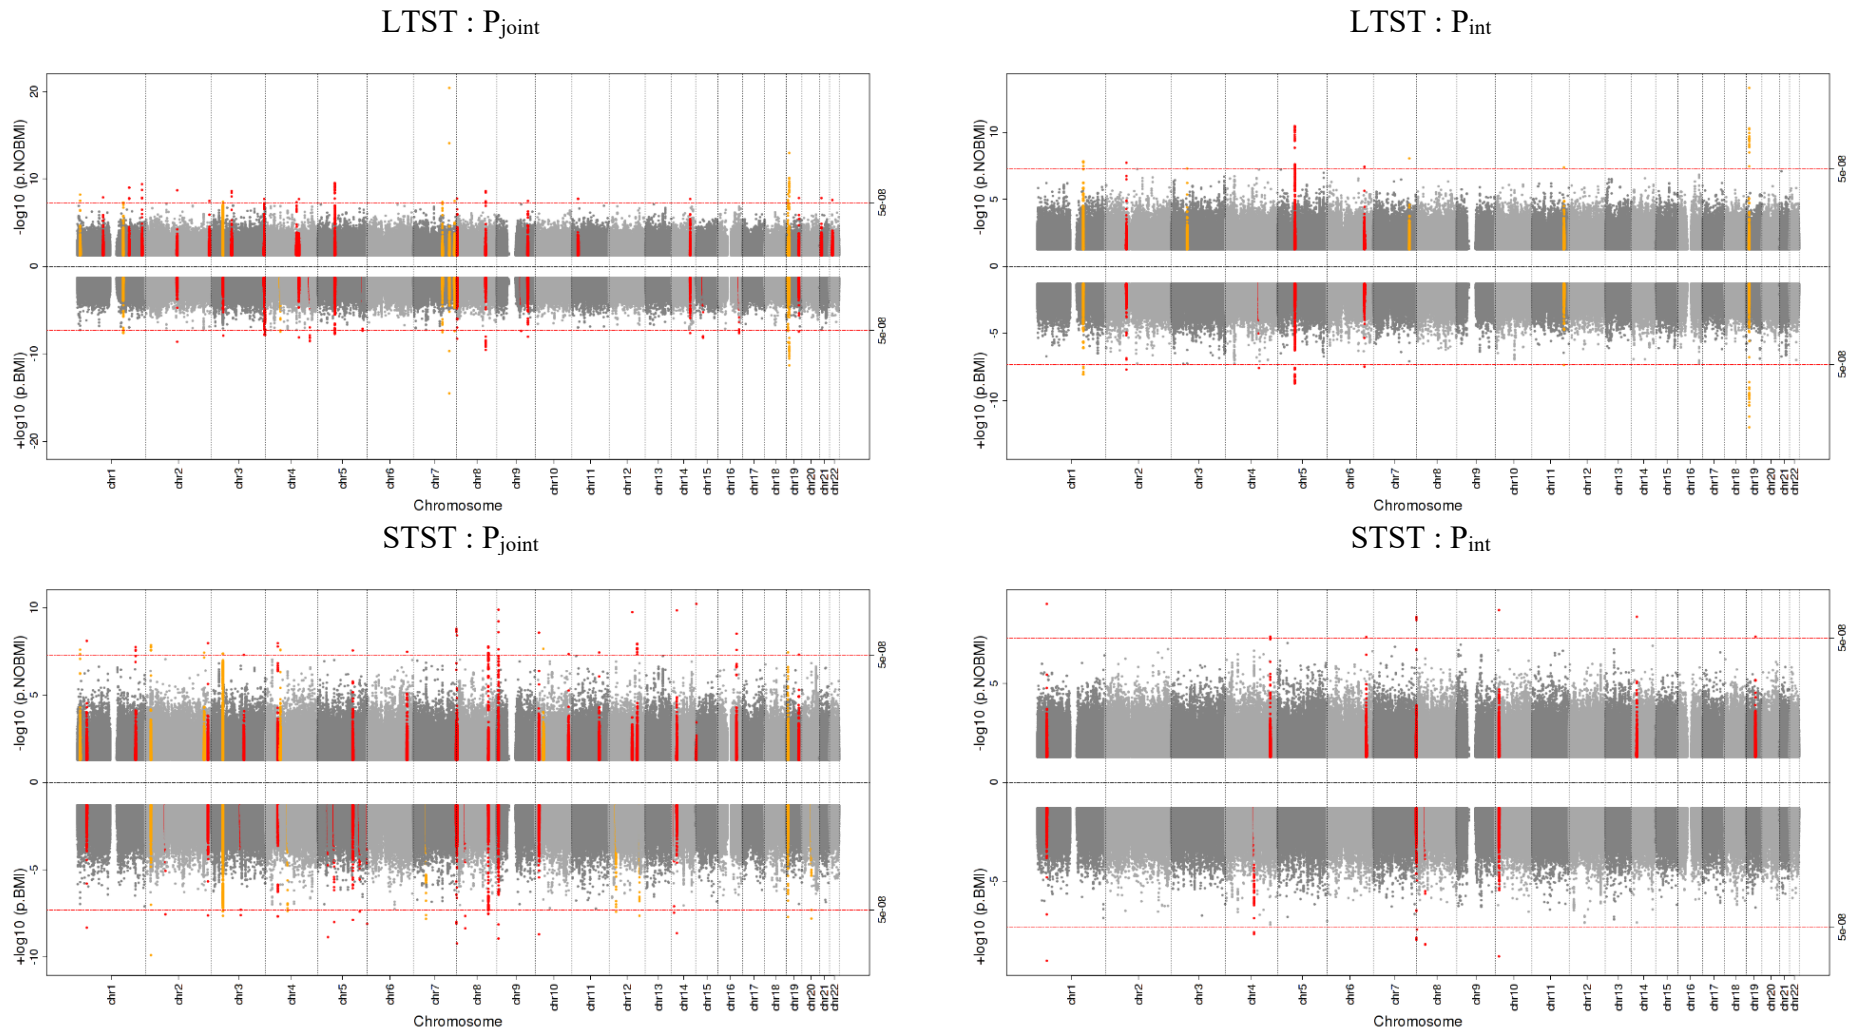

Supplementary Fig. 2. QQ plots of genome-wide gene-sleep interaction analyses in stage 1 MULTI ancestry group.

LTST-SBP

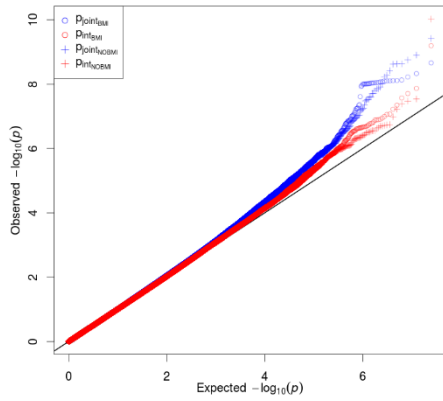

LTST-DBP

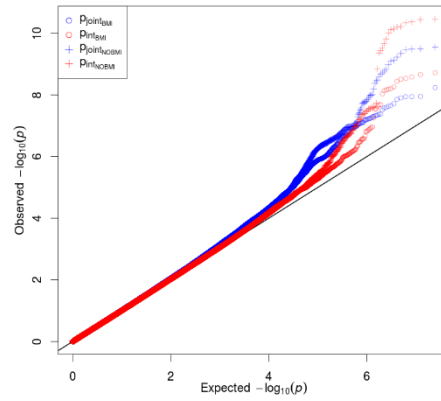

LTST-MAP

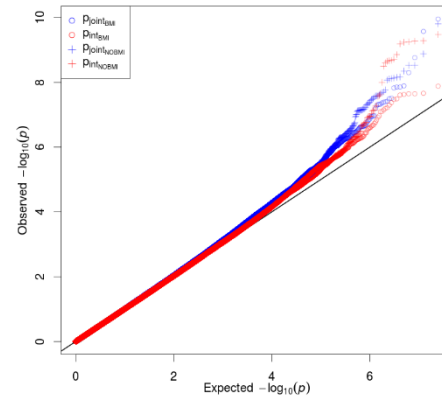

LTST-PP

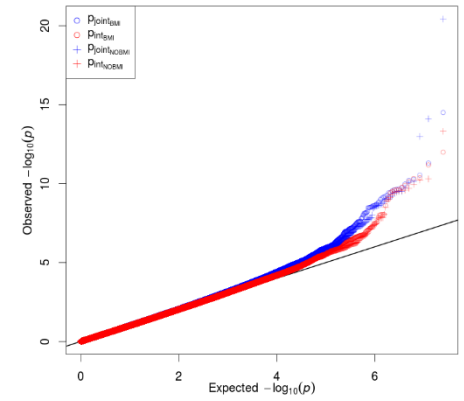

STST-SBP

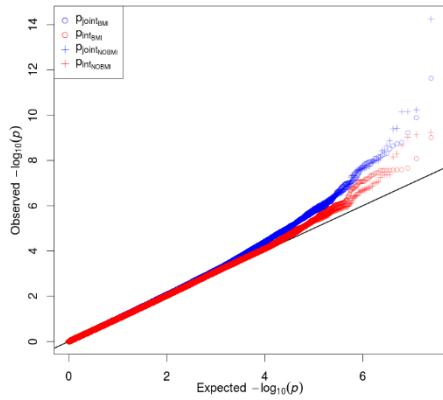

STST-DBP

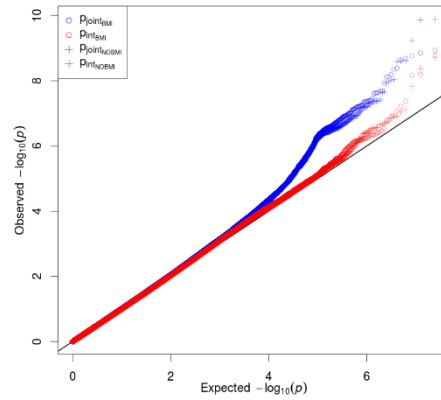

STST-MAP

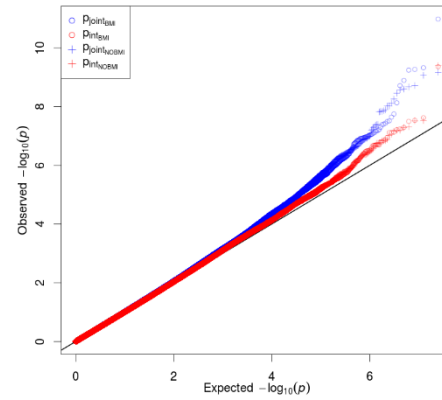

STST-PP

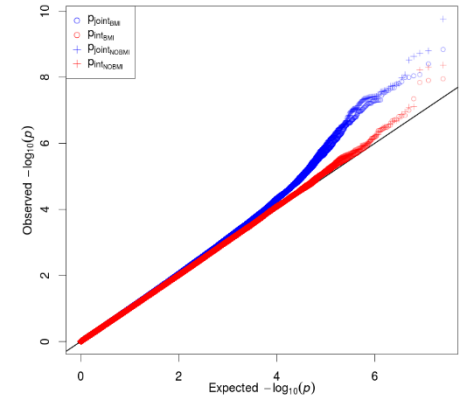

### Supplementary Fig. 3. Miami plots of genome-wide gene-sleep interaction analyses in stage 1 EUR group.

Upper panel are results without adjusting for BMI, lower panel are results adjusted for BMI. The minimum p-values across four BP traits were used to generate each plot. The orange points correspond to significant loci ( $P < 5 \times 10^{-8}$ ) overlapped with previously reported BP loci (distance  $< 1\text{Mb}$ ), and the red points correspond to novel significant loci.

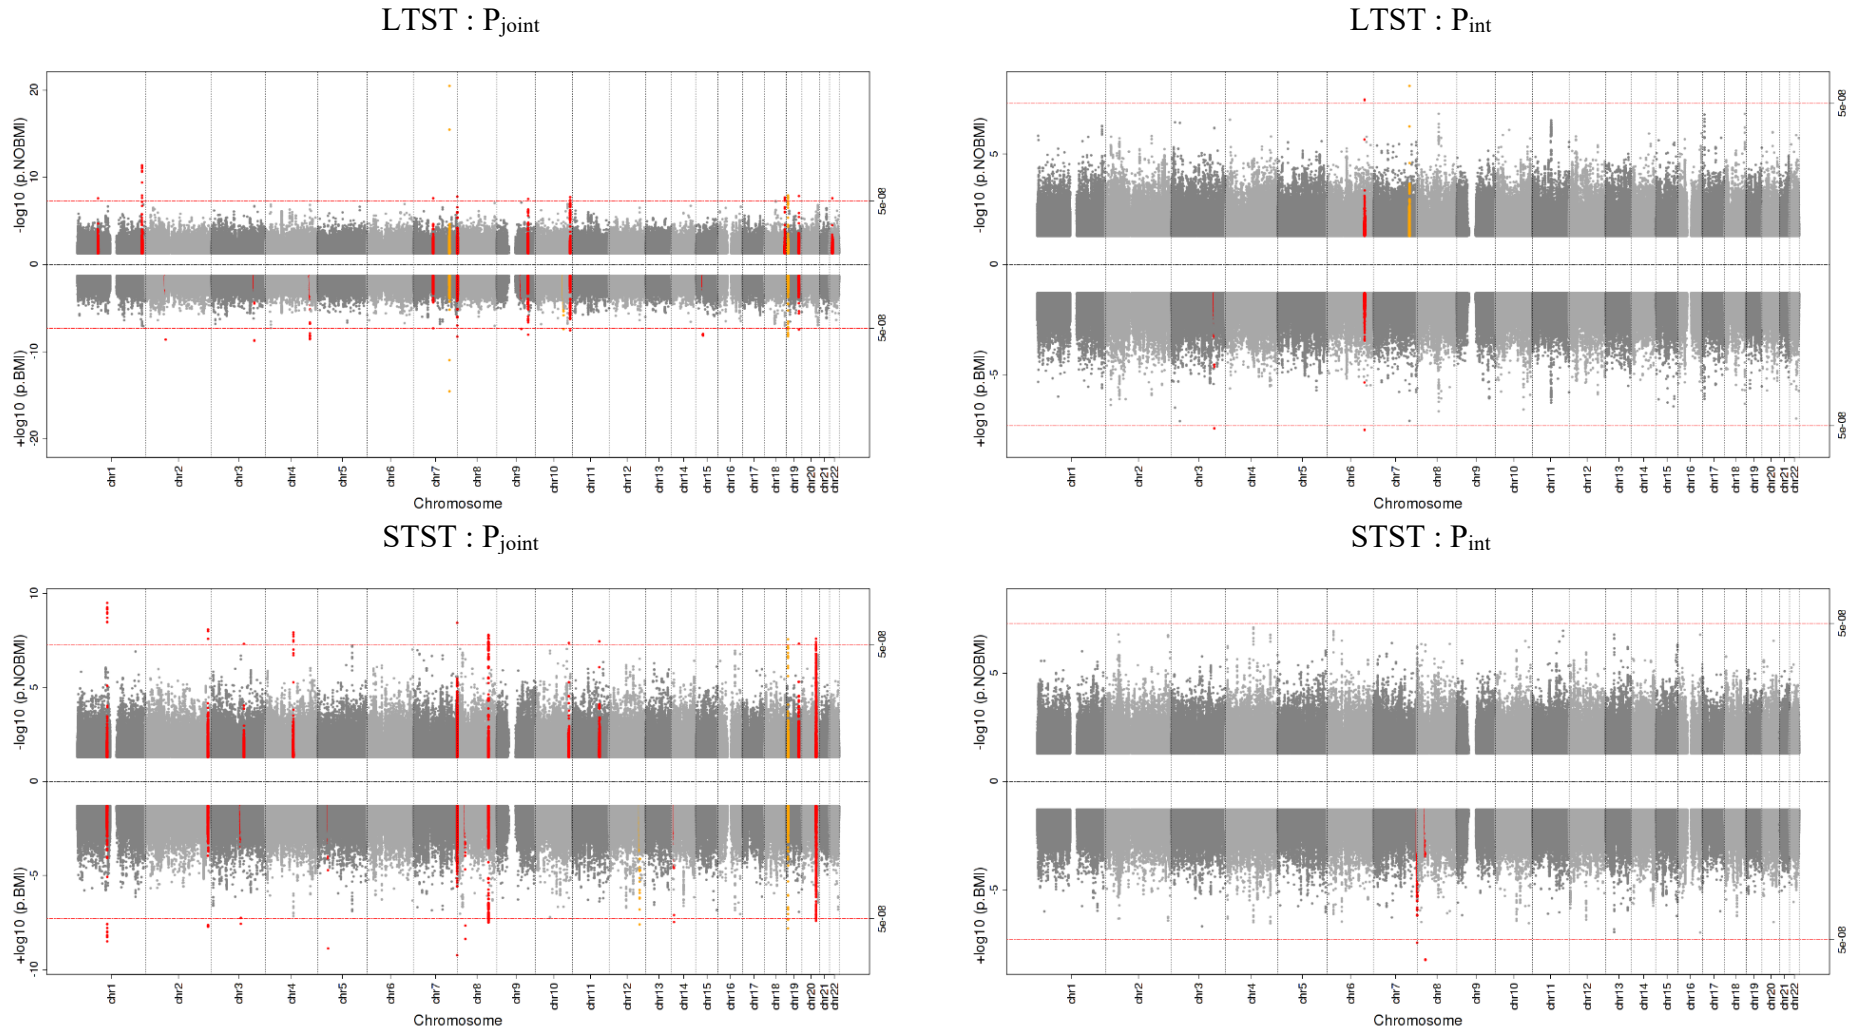



Supplementary Fig. 4. QQ plots of genome-wide gene-sleep interaction analyses in stage 1 EUR group.

LTST-SBP

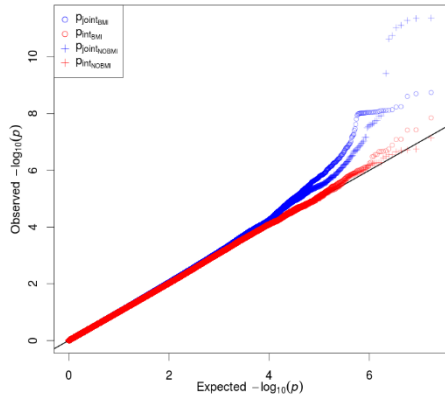

LTST-DBP

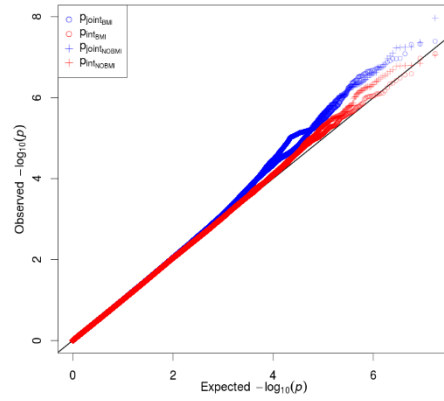

LTST-MAP

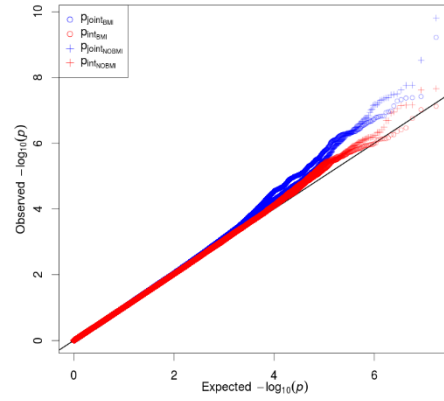

LTST-PP

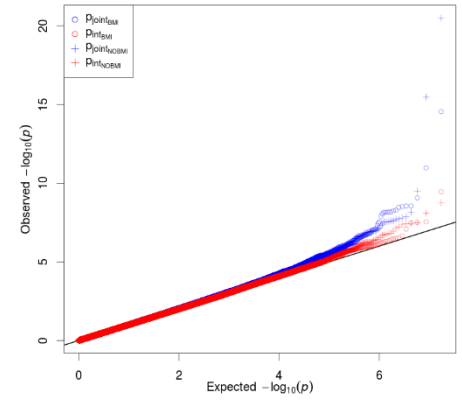

STST-SBP

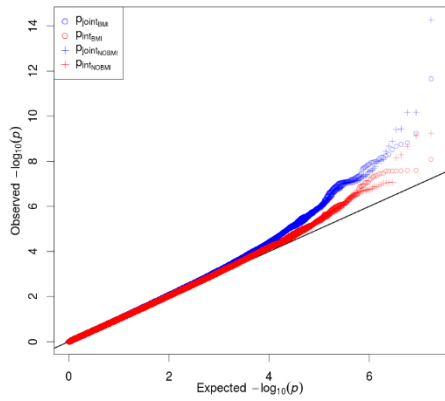

STST-DBP

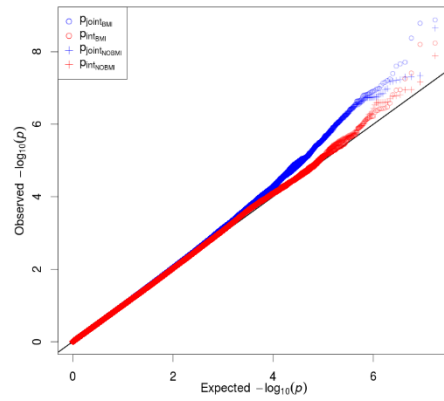

STST-MAP

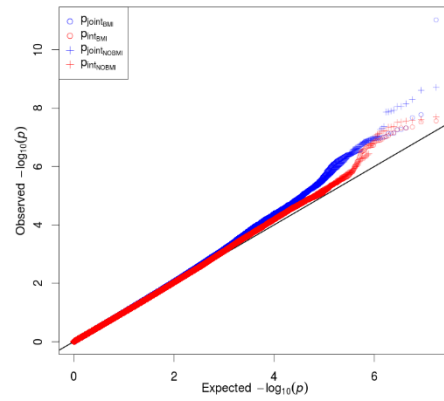

STST-PP

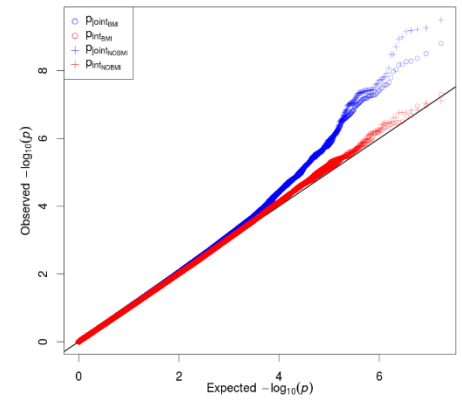

### Supplementary Fig. 5. Miami plots of genome-wide gene-sleep interaction analyses in stage 1 AFR group.

Upper panel are results without adjusting for BMI, lower panel are results adjusted for BMI. The minimum p-values across four BP traits were used to generate each plot. The orange points correspond to significant loci ( $P < 5 \times 10^{-8}$ ) overlapped with previously reported BP loci (distance  $< 1\text{Mb}$ ), and the red points correspond to novel significant loci.

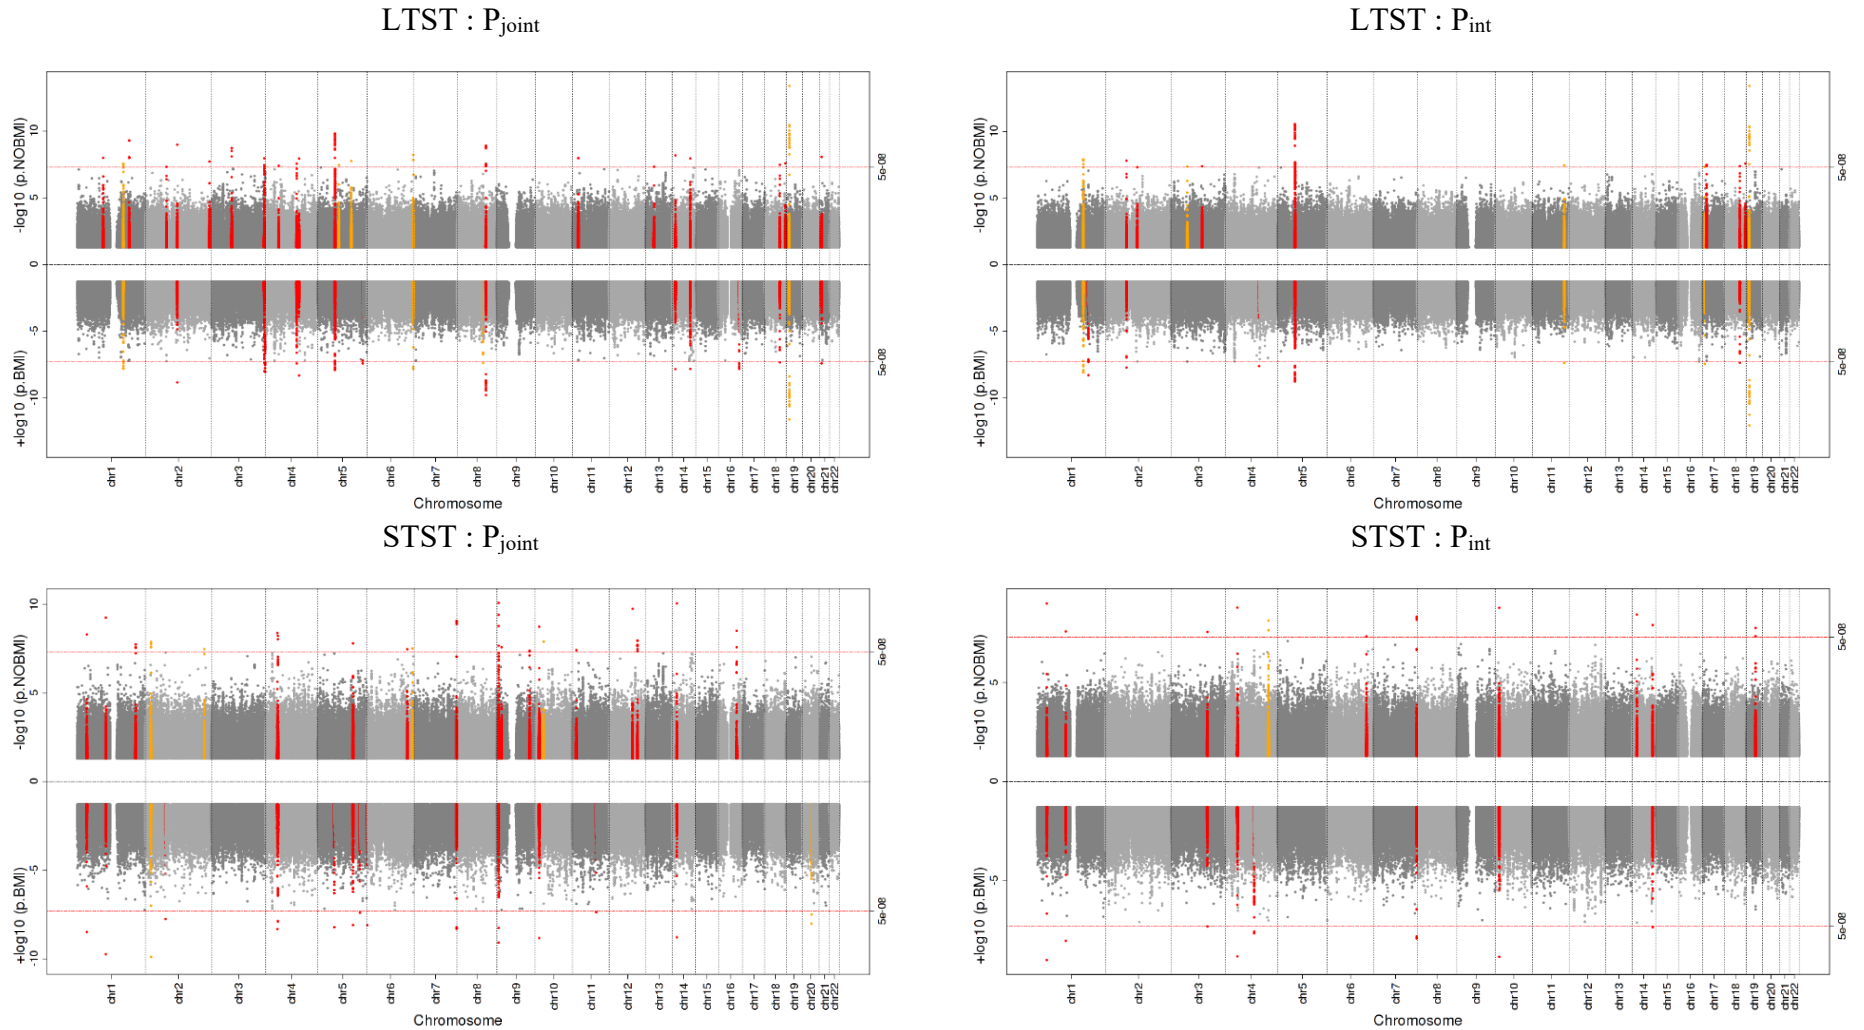

Supplementary Fig. 6. QQ plots of genome-wide gene-sleep interaction analyses in stage 1 AFR group.

LTST-SBP

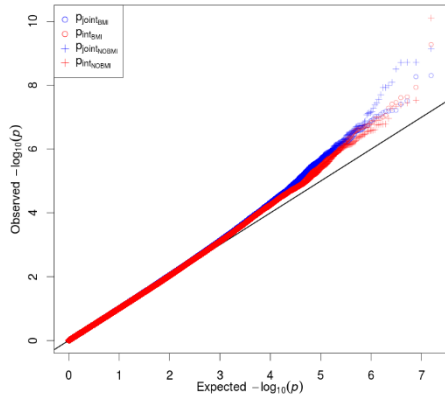

LTST-DBP

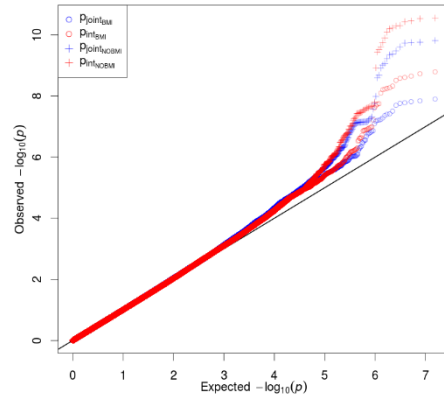

LTST-MAP

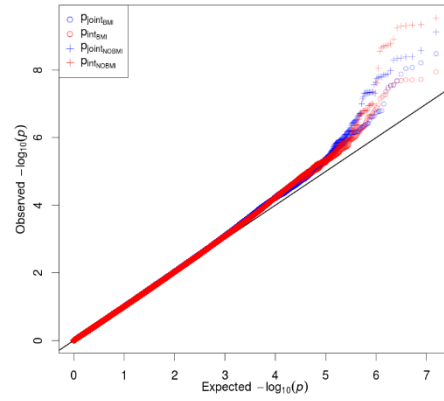

LTST-PP

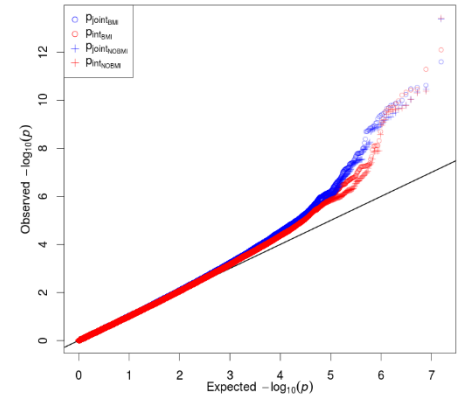

STST-SBP

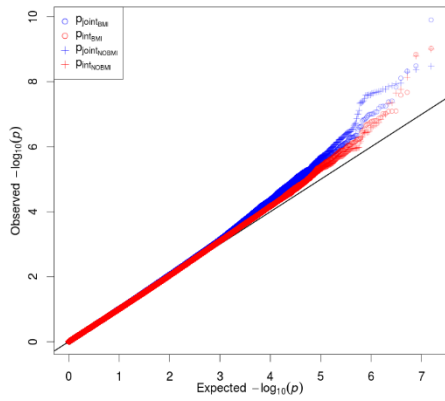

STST-DBP

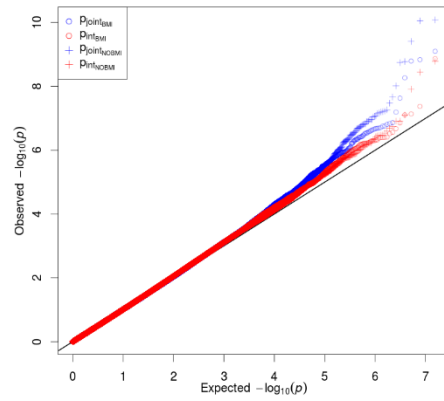

STST-MAP

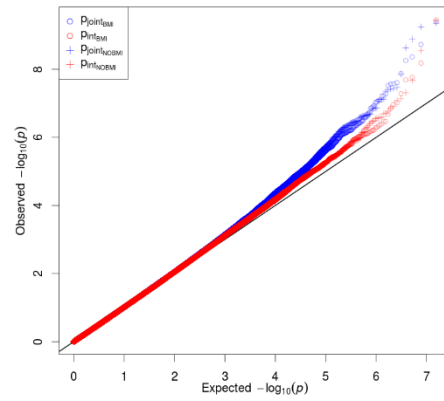

STST-PP

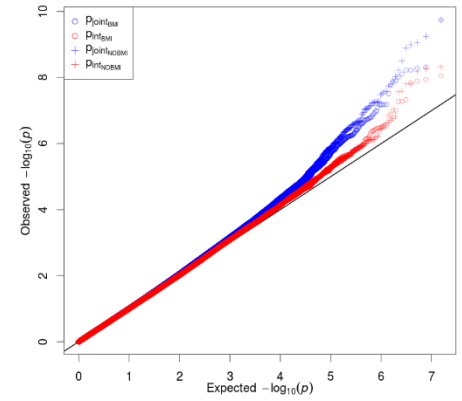

Supplementary Fig. 7. Regional association plots of  $P_{\text{joint}}$  and  $P_{\text{int}}$  for 3 replicated novel loci in stage 1+2 MULTI ancestry analyses (Table 1).

Locus 1. LTST- MAP

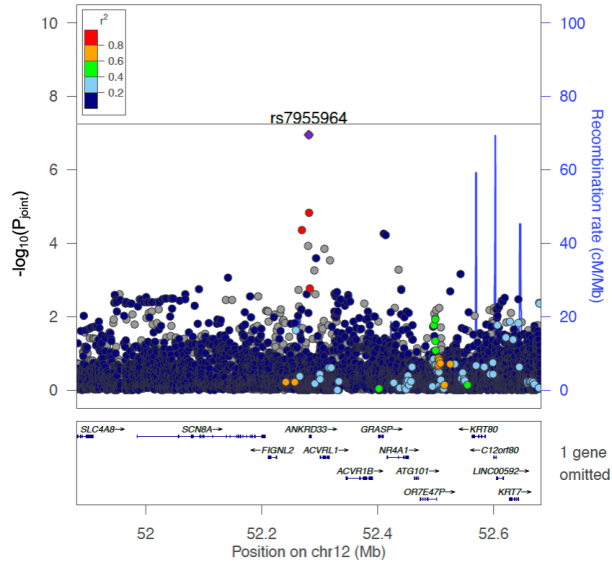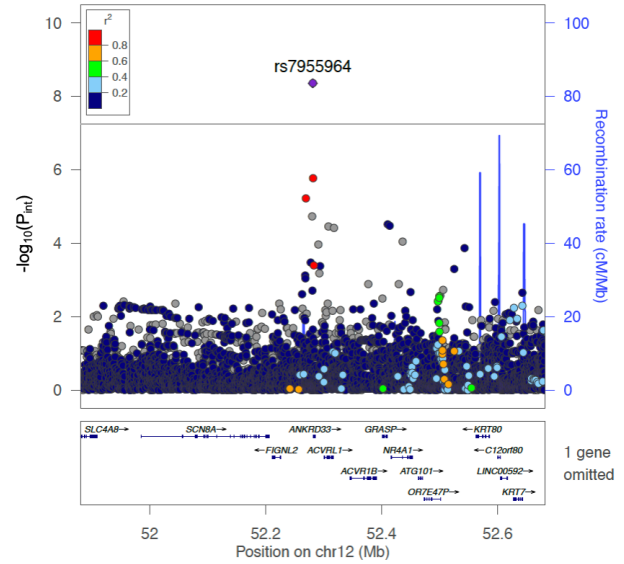

Locus 2. STST- DBP

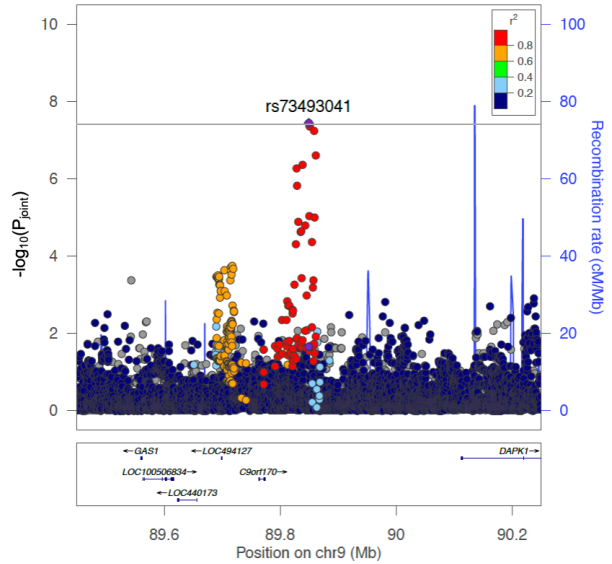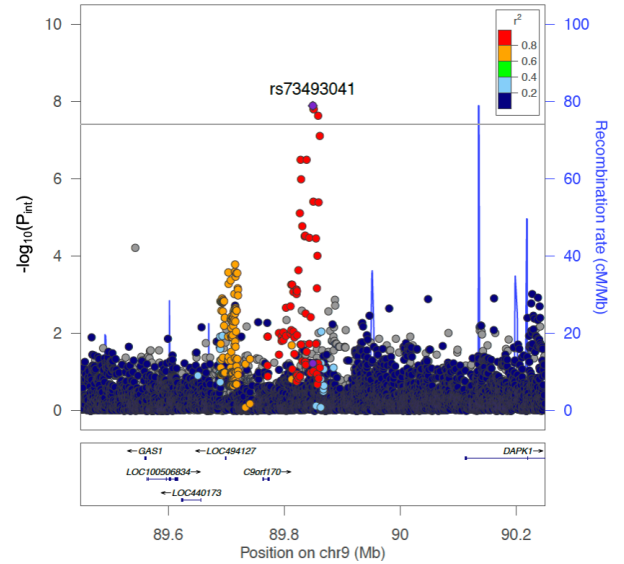

Locus 3. STST- PP

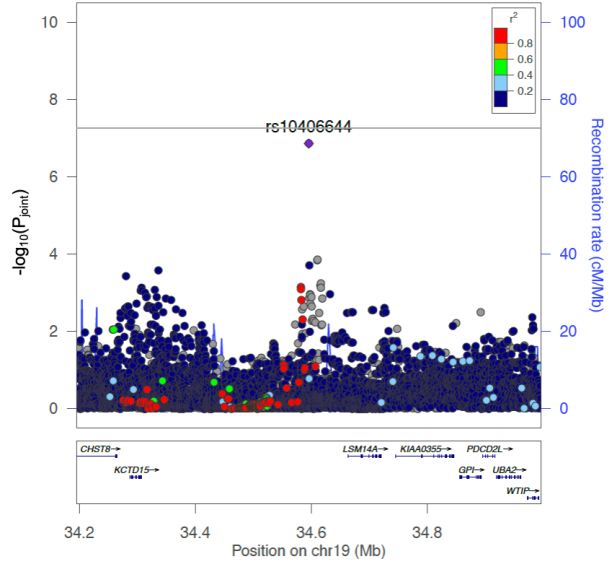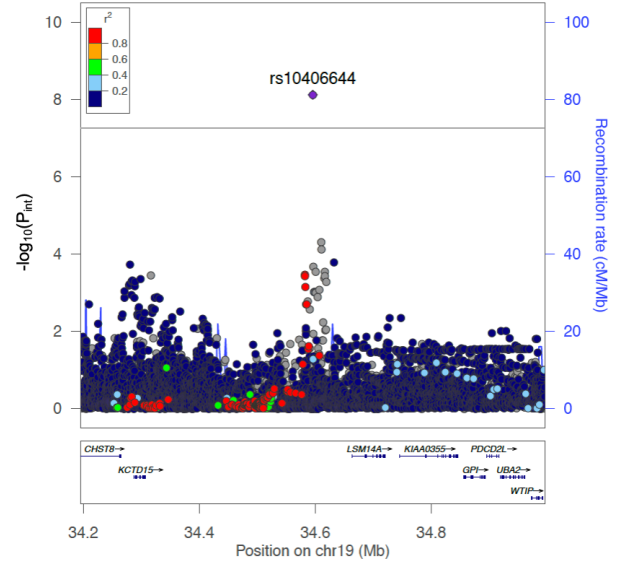

Supplementary Fig. 8. Regional association plots of  $P_{\text{joint}}$  and  $P_{\text{int}}$  for 3 novel loci in stage 1 AFR analyses (Supplementary Table 8).

Locus 1. LTST-PP

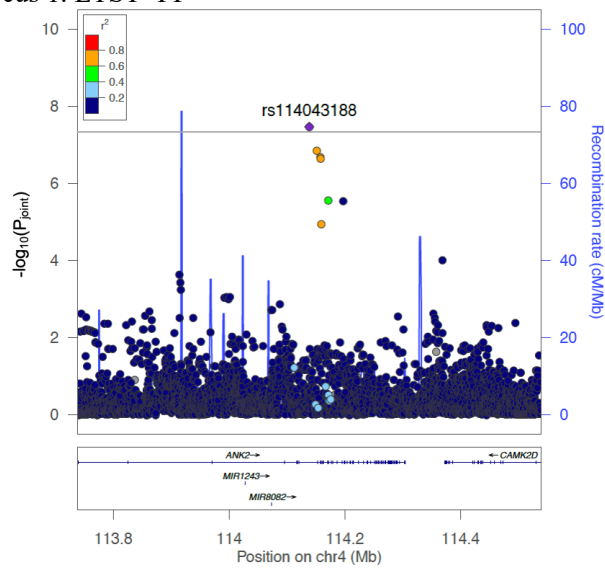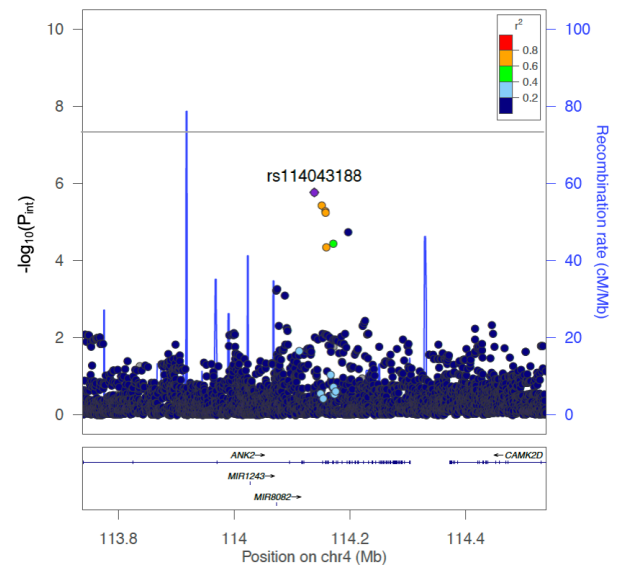

Locus 2. LTST-SBP

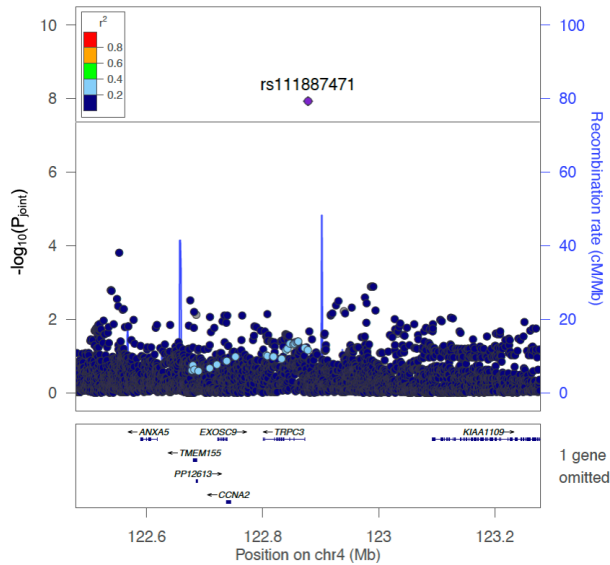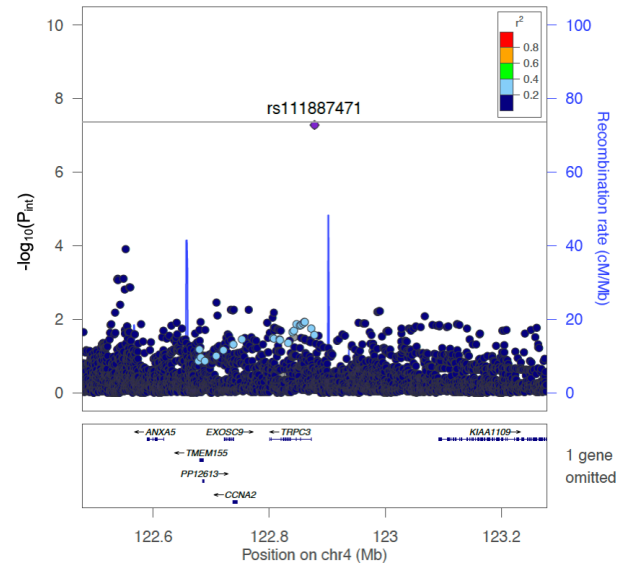

Locus 3. LTST-PP

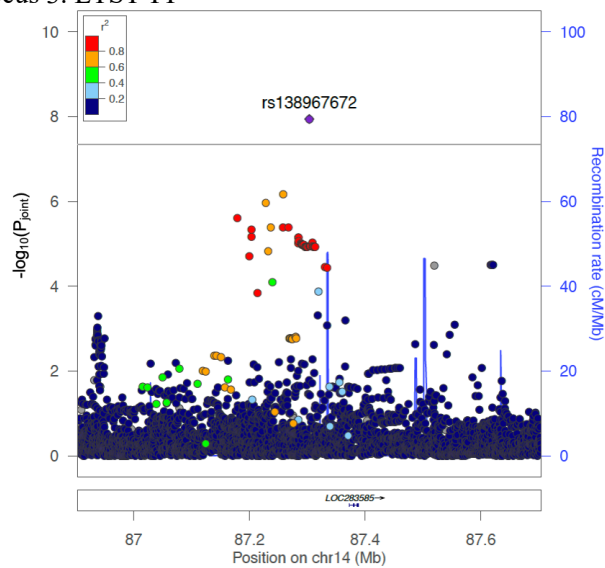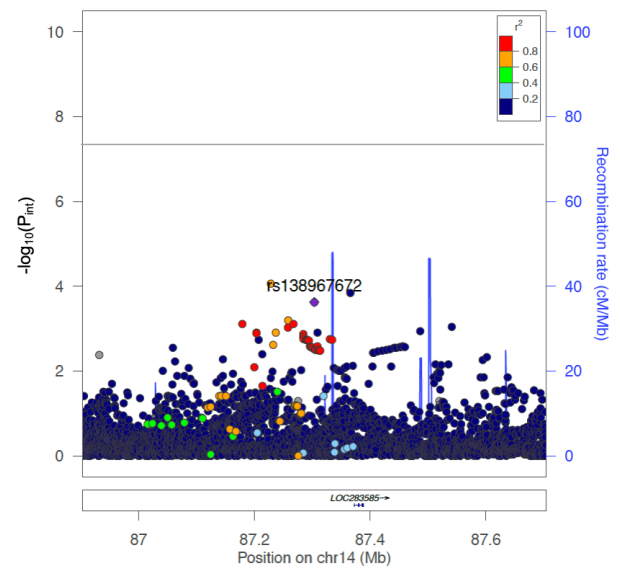

### Supplementary Fig. 9. Miami plots of genome-wide gene-sleep interaction analyses in stage 1+2 MULTI ancestry group.

Upper panel are results without adjusting for BMI, lower panel are results adjusted for BMI. The minimum p-values across four BP traits were used to generate each plot. The orange points correspond to significant loci ( $P < 5 \times 10^{-8}$ ) overlapped with previously reported BP loci (distance  $< 1\text{Mb}$ ), and the red points correspond to novel significant loci.

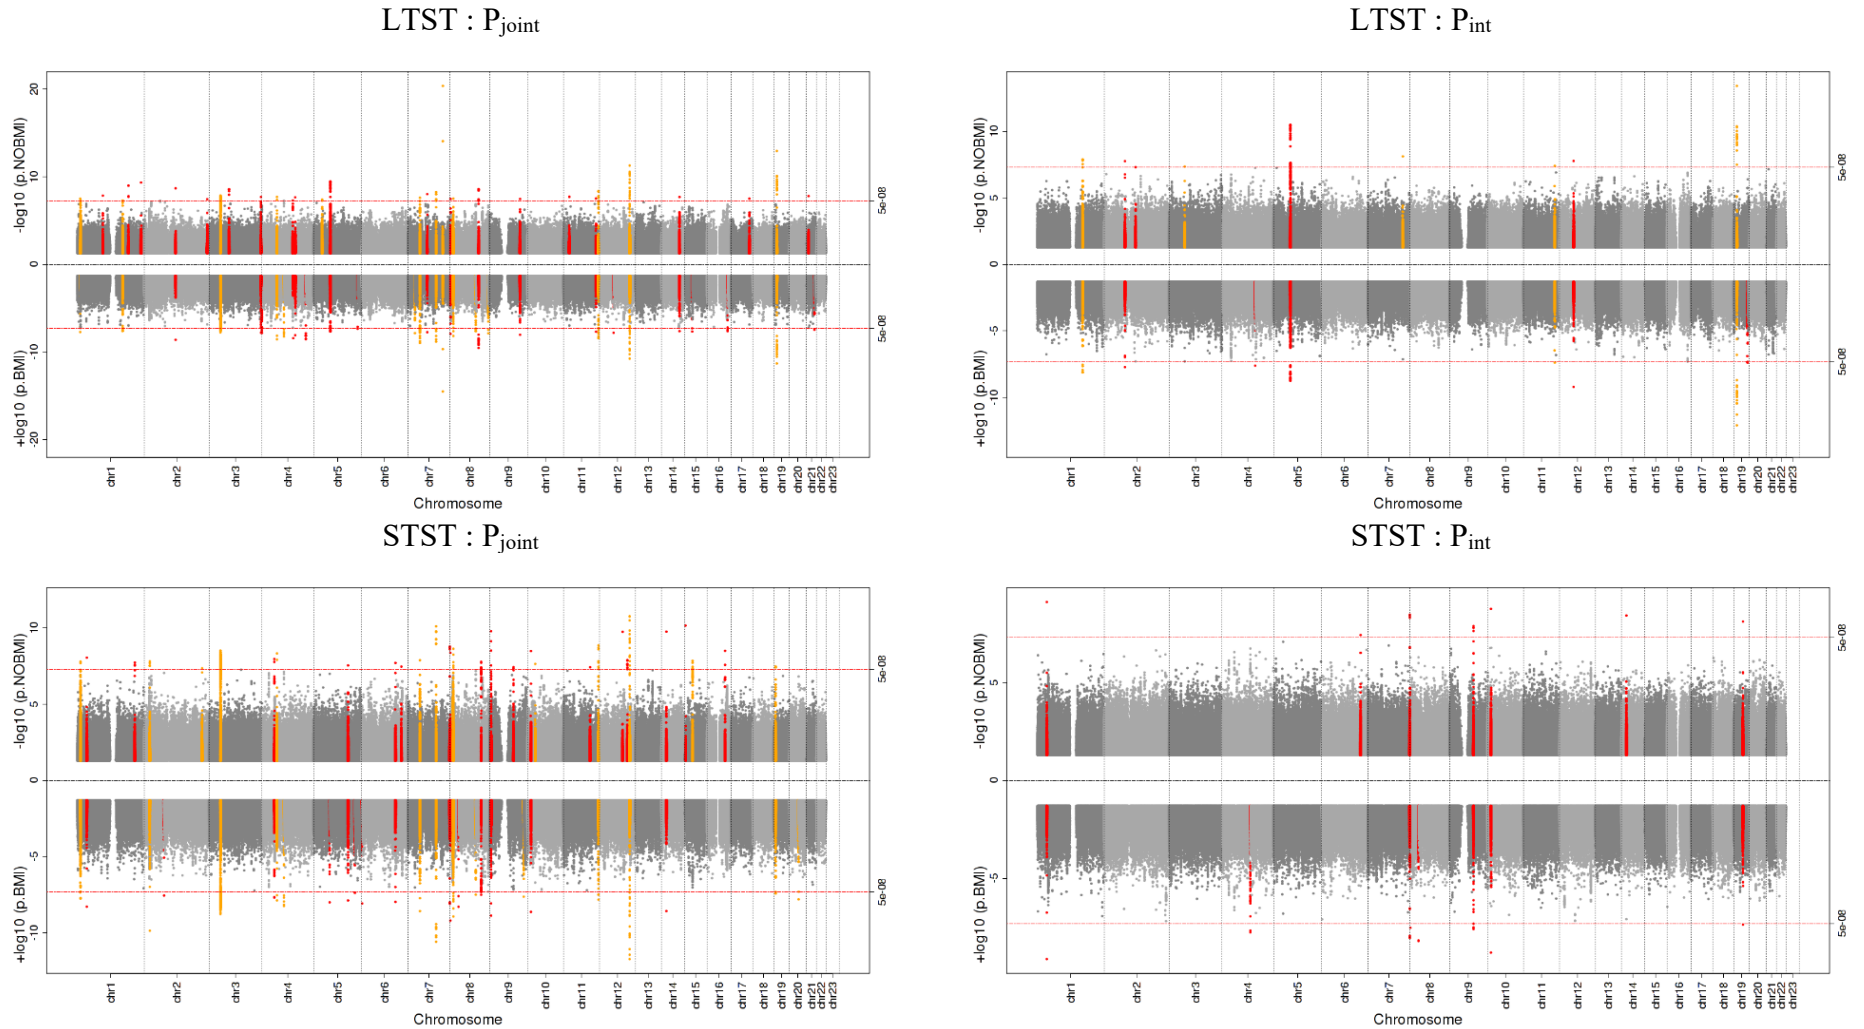

Supplementary Fig. 10. QQ plots of genome-wide gene-sleep interaction analyses in stage 1+2 MULTI ancestry group.

LTST-SBP

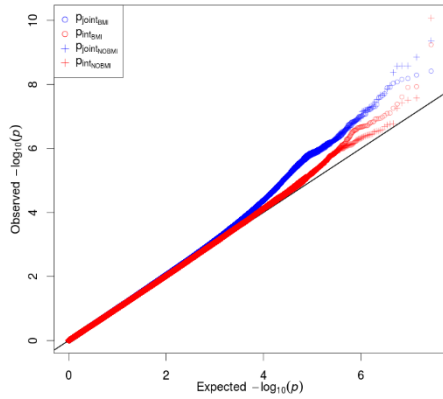

LTST-DBP

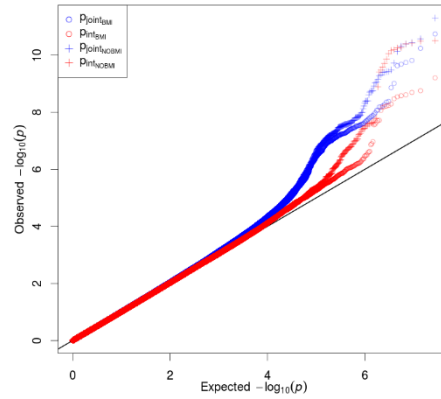

LTST-MAP

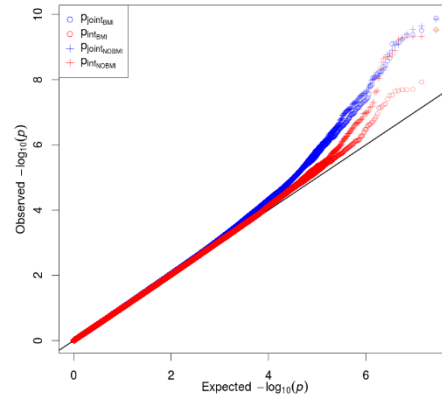

LTST-PP

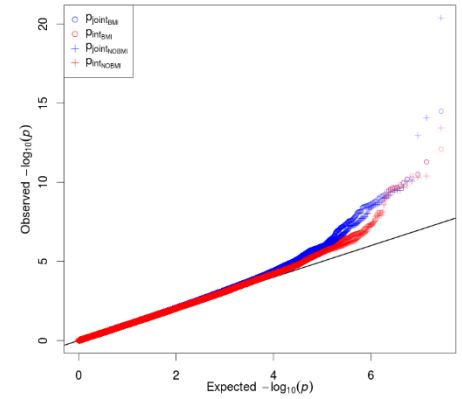

STST-SBP

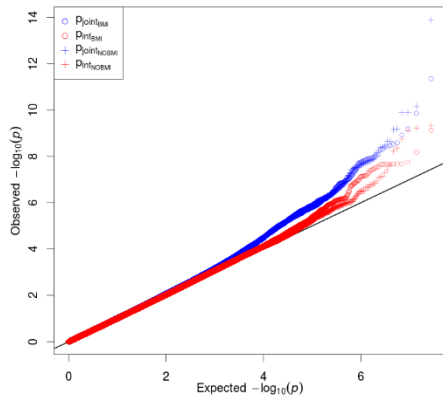

STST-DBP

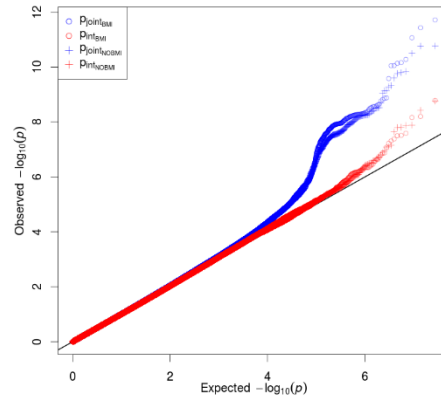

STST-MAP

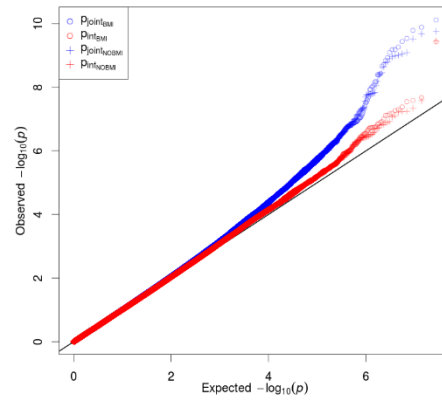

STST-PP

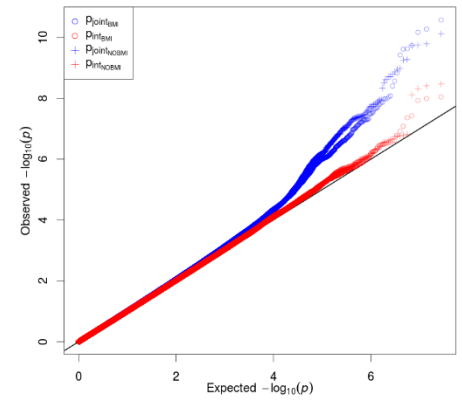



### Supplementary Fig. 11. Miami plots of genome-wide gene-sleep interaction analyses in stage 1+2 EUR group.

Upper panel are results without adjusting for BMI, lower panel are results adjusted for BMI. The minimum p-values across four BP traits were used to generate each plot. The orange points correspond to significant loci ( $P < 5 \times 10^{-8}$ ) overlapped with previously reported BP loci (distance  $< 1\text{Mb}$ ), and the red points correspond to novel significant loci.

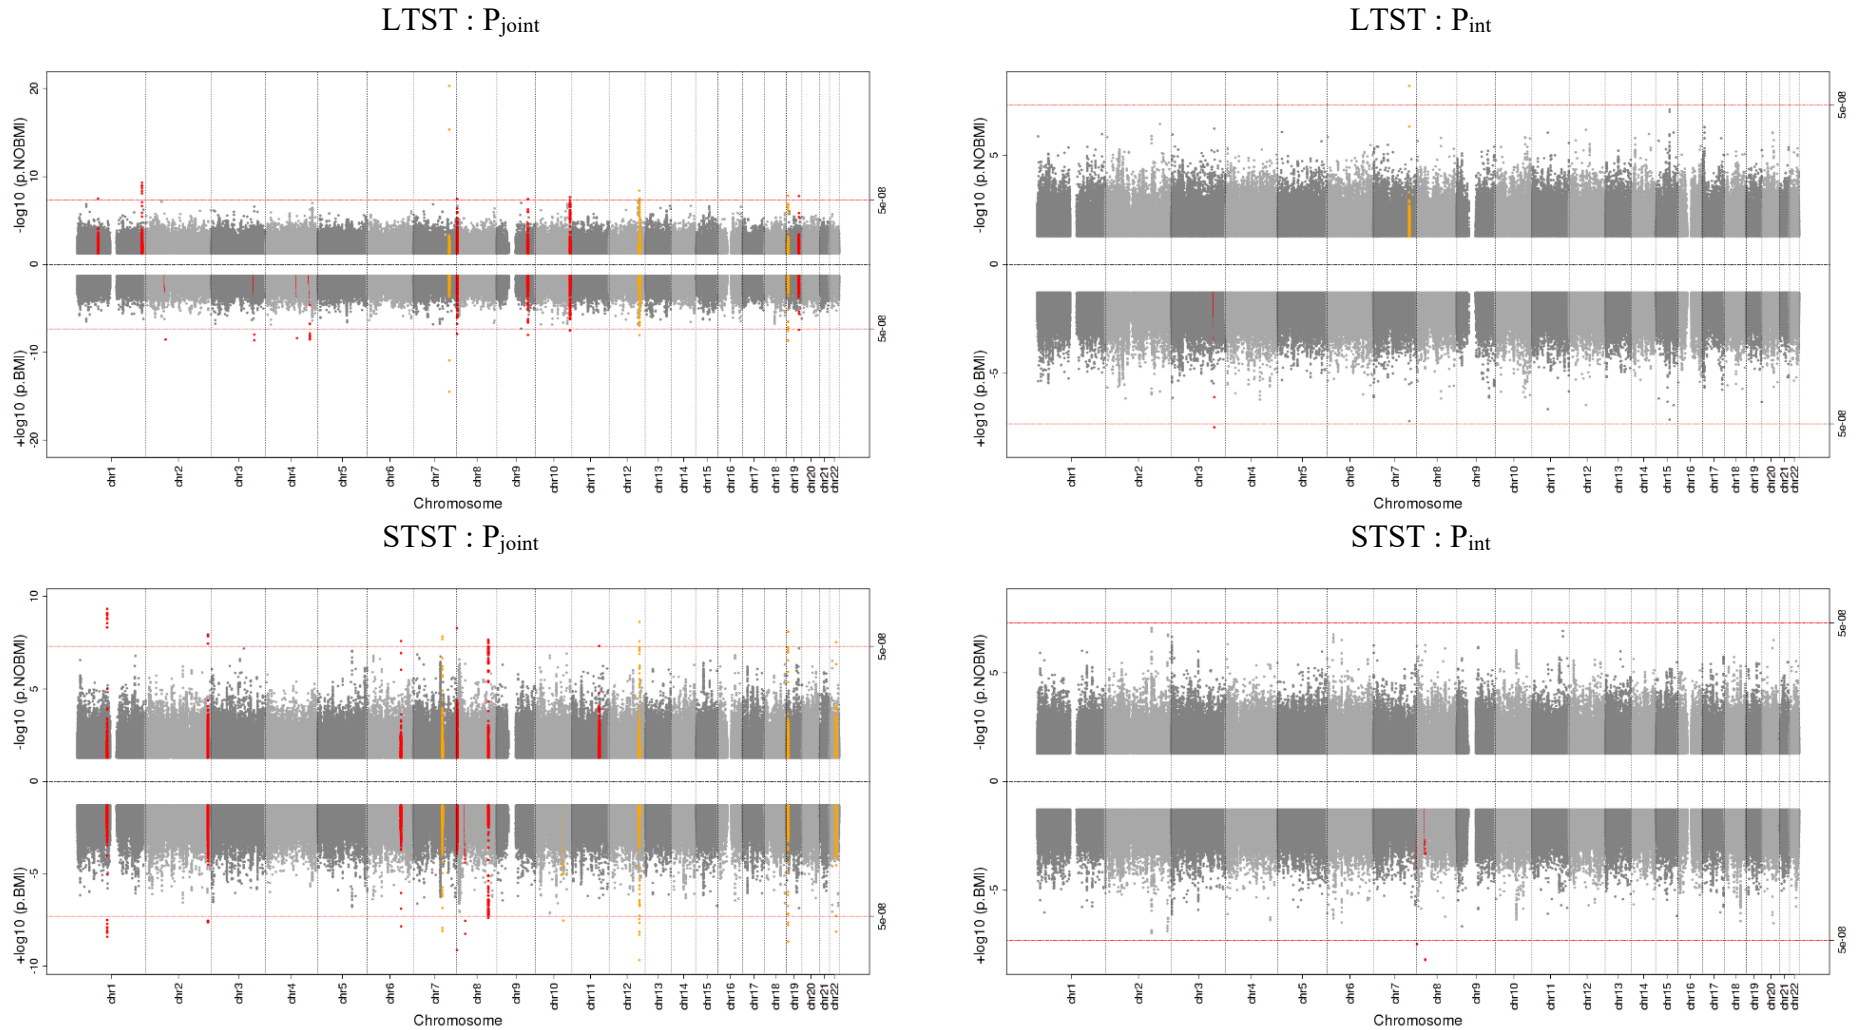

Supplementary Fig. 12. QQ plots of genome-wide gene-sleep interaction analyses in stage 1+2 EUR group.

LTST-SBP

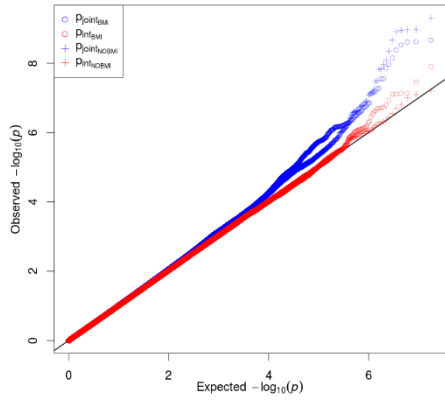

LTST-DBP

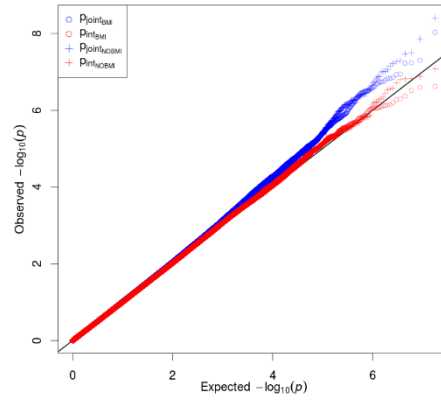

LTST-MAP

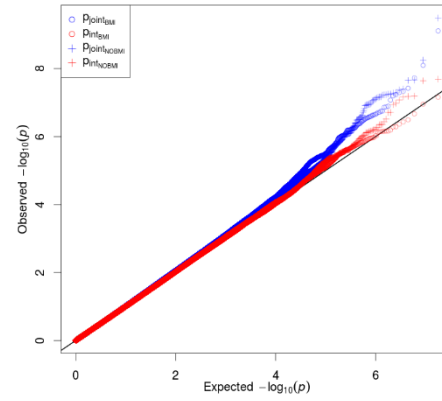

LTST-PP

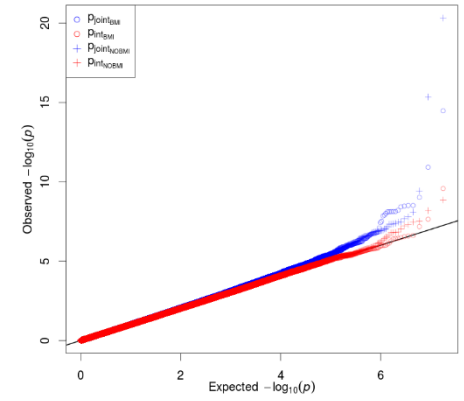

STST-SBP

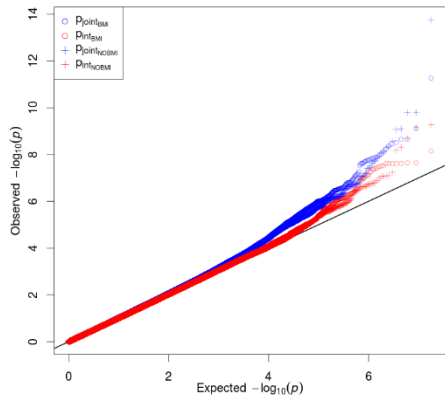

STST-DBP

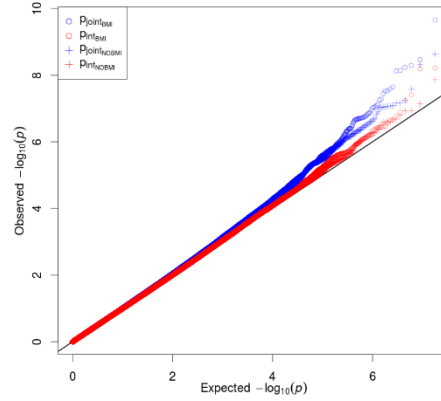

STST-MAP

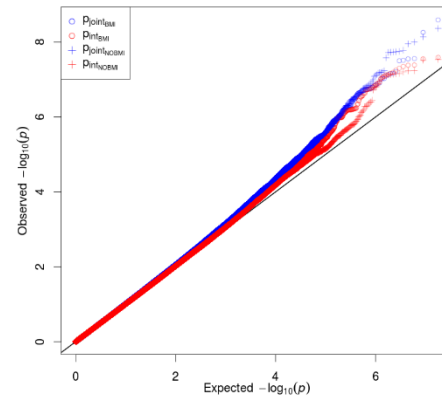

STST-PP

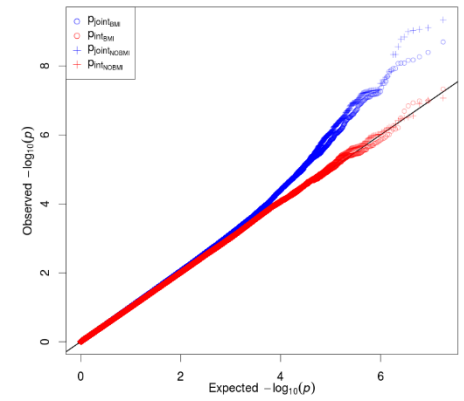

Supplementary Fig. 13. Regional association plots of  $P_{\text{joint}}$  and  $P_{\text{int}}$  for 20 novel loci in stage 1+2 analyses (Supplementary Table 10).

Locus 1. LTST- PP

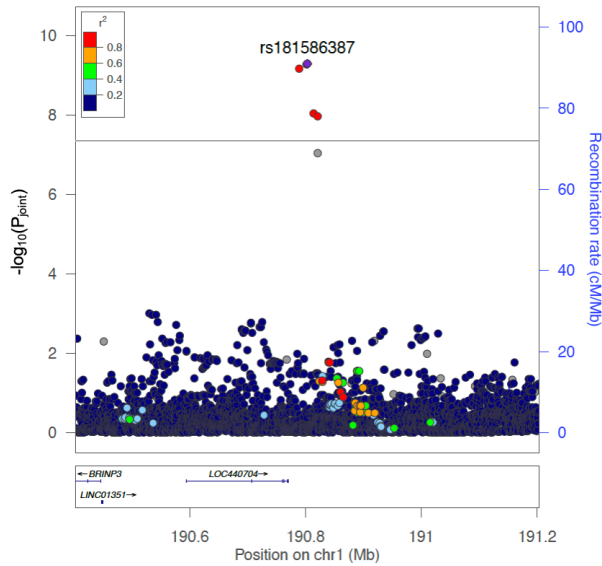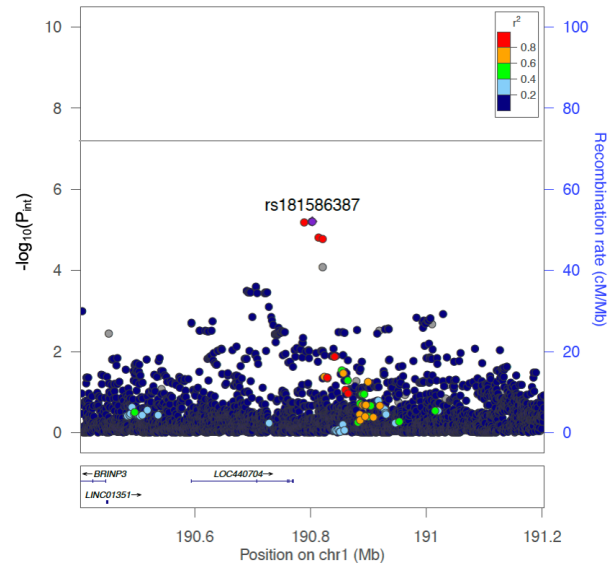

Locus 2. LTST- SBP

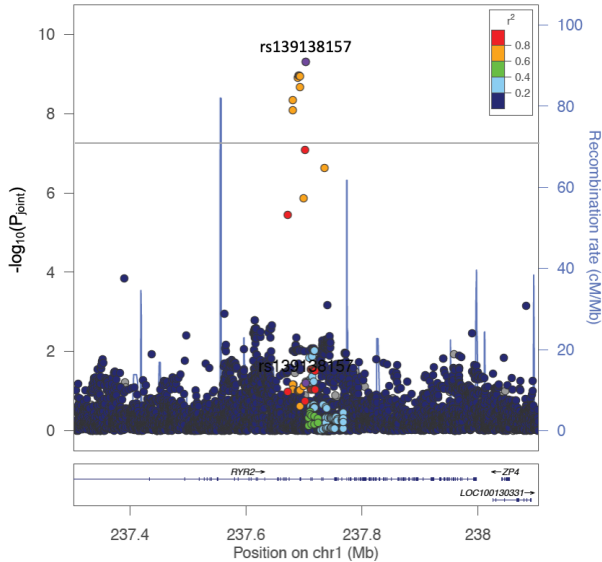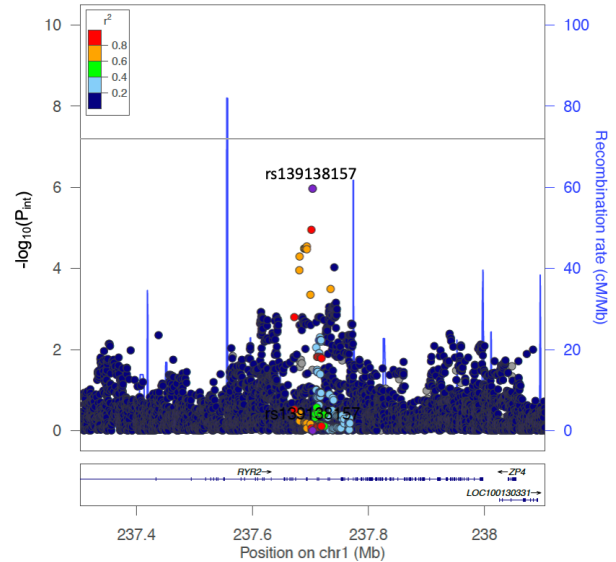

Locus 3. LTST- MAP

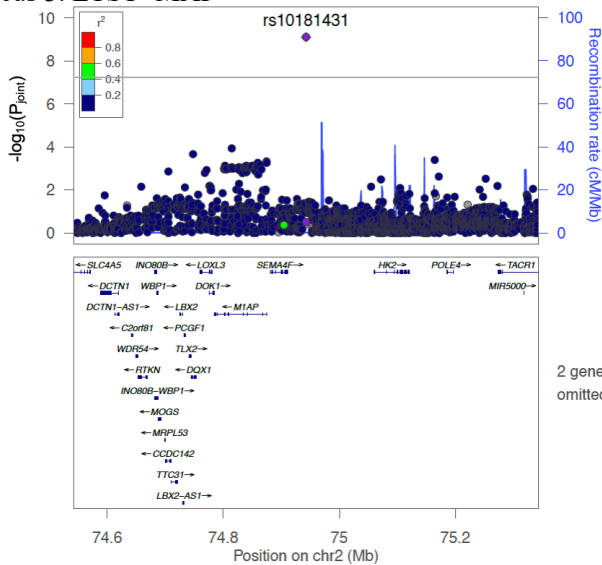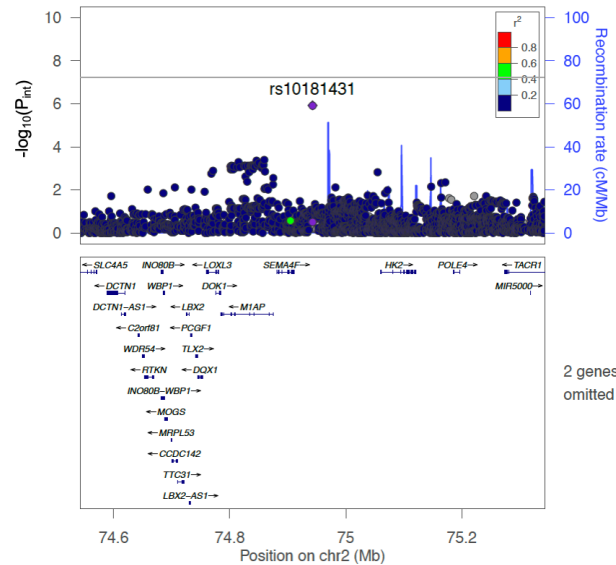

Locus 4. LTST- PP

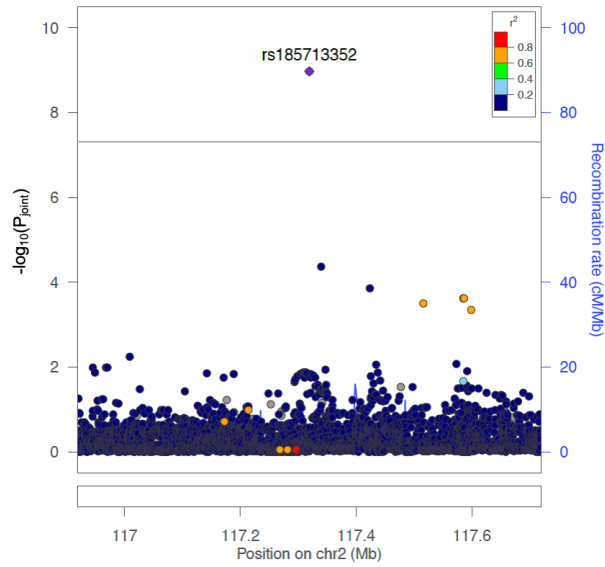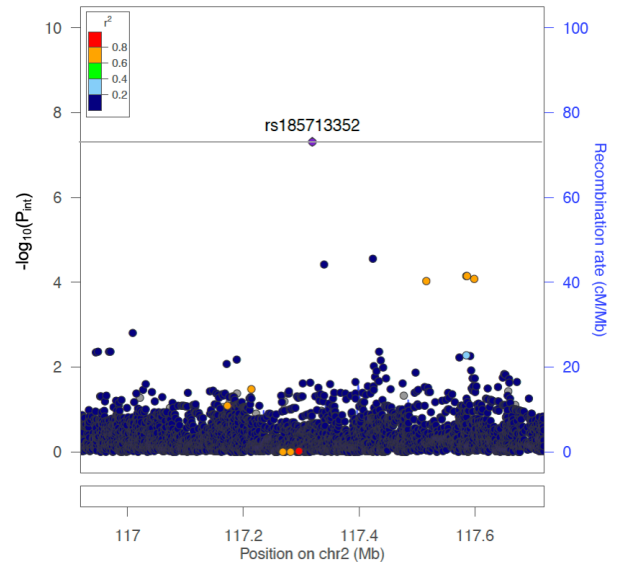

Locus 5. LTST- SBP

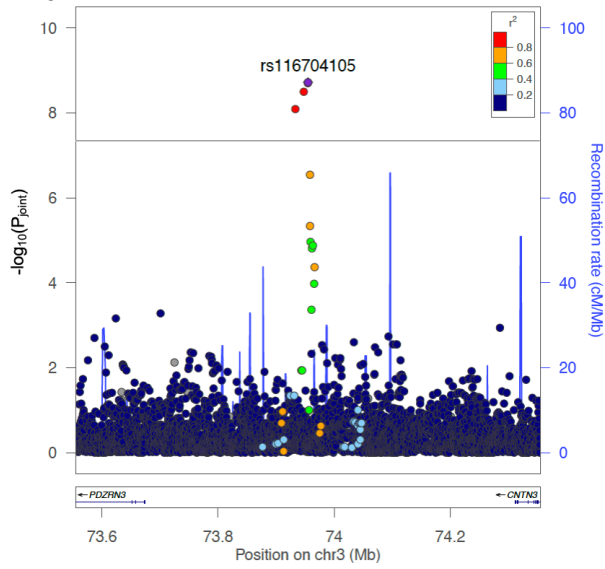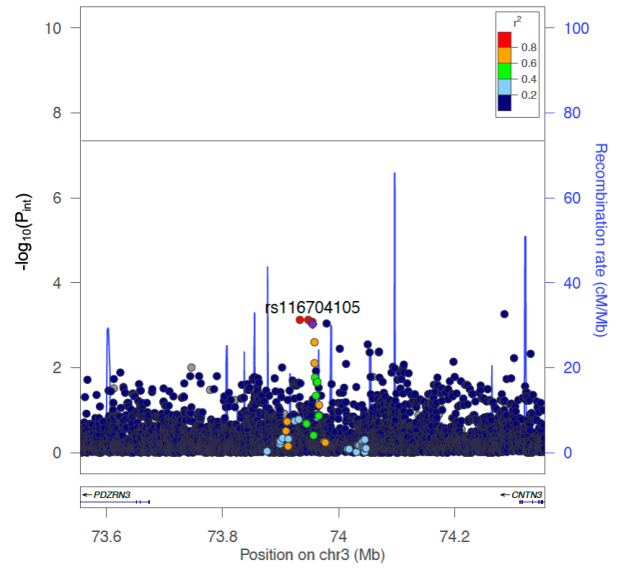

Locus 6. LTST- SBP

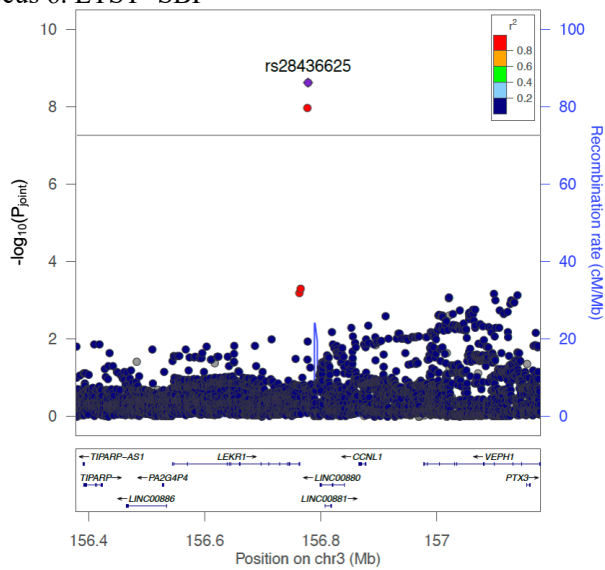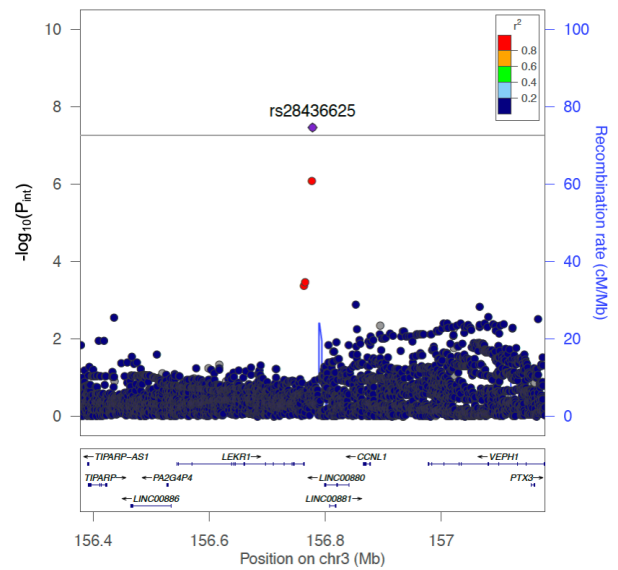

Locus 7. LTST- PP

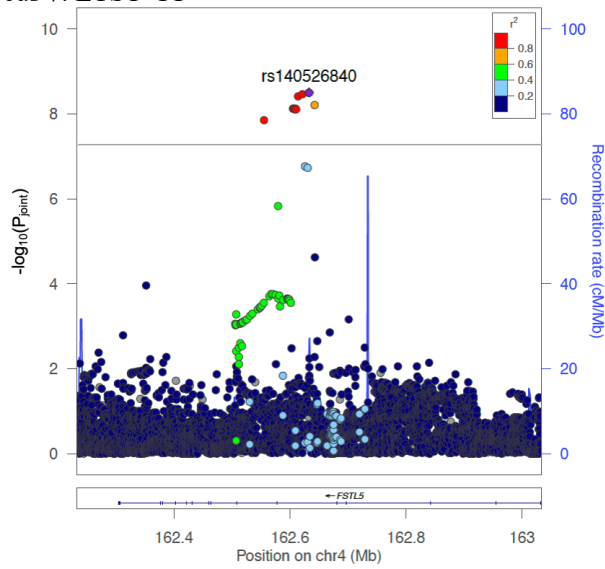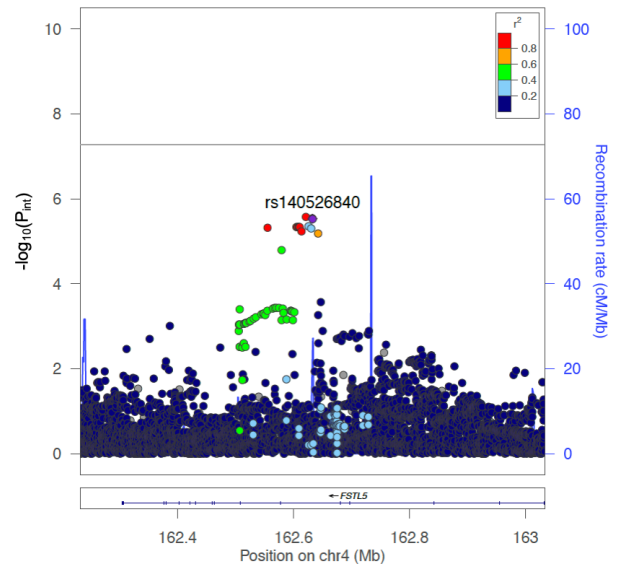

Locus 8. LTST- DBP

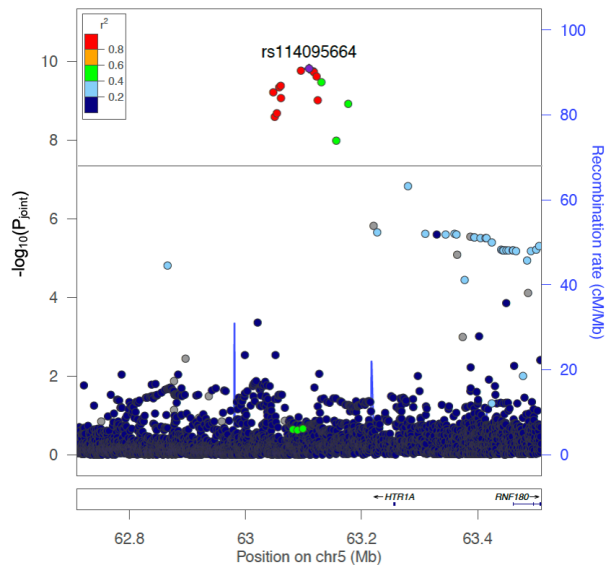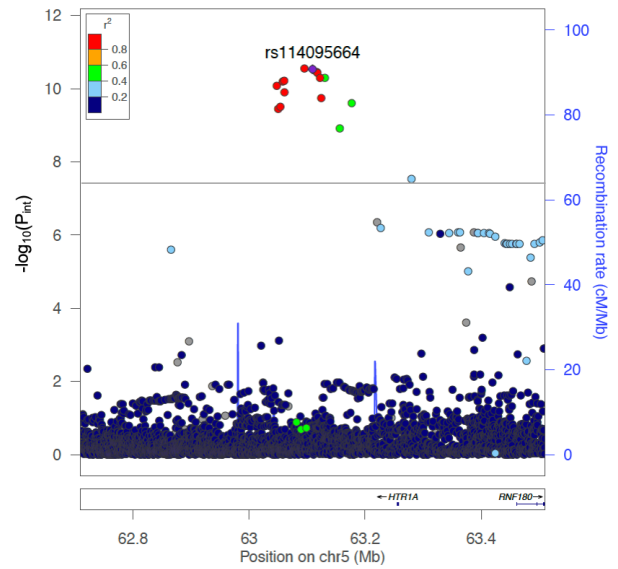

Locus 9. LTST- PP

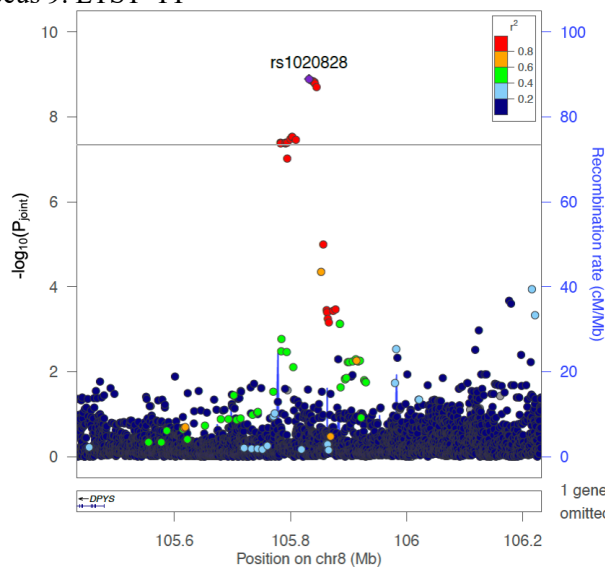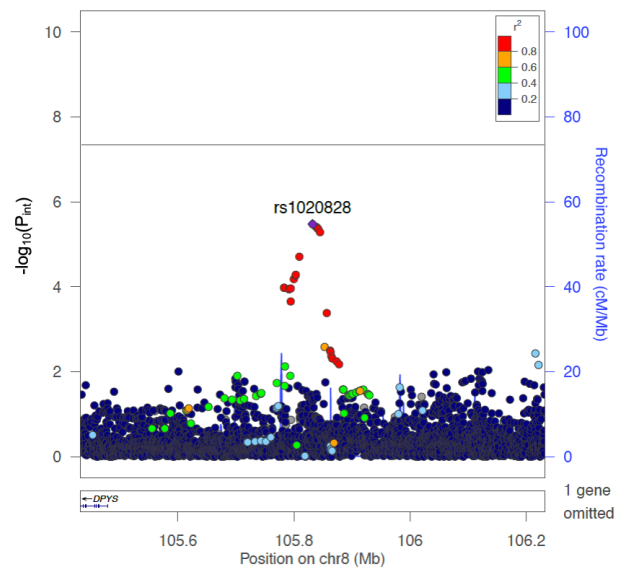

Locus 10. STST- SBP

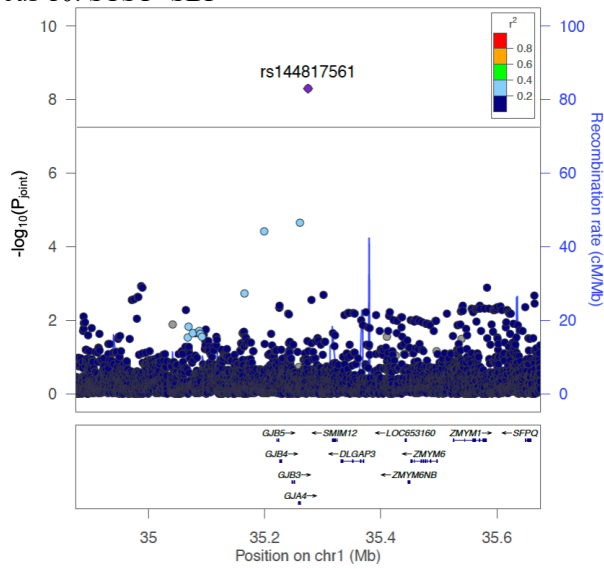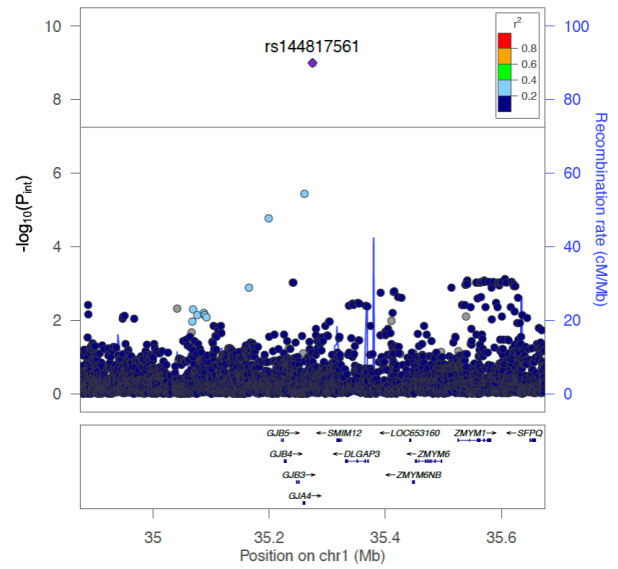

Locus 11. STST- PP

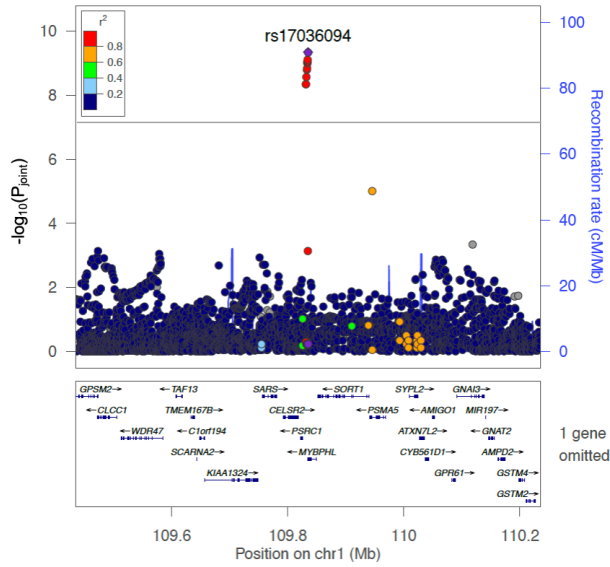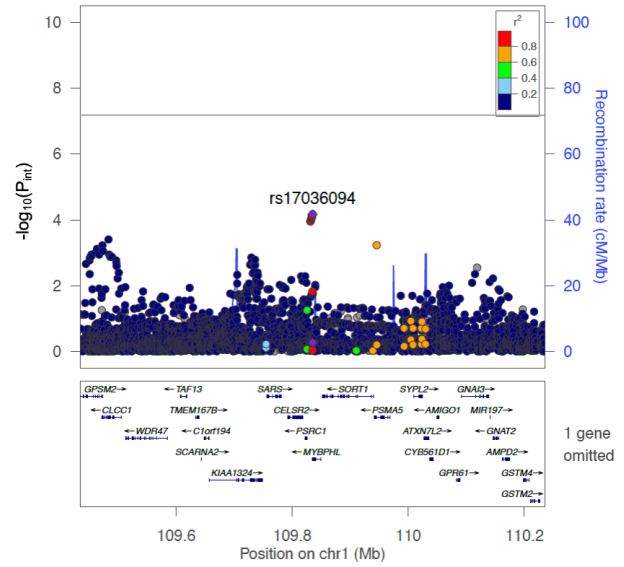

Locus 12. STST- MAP

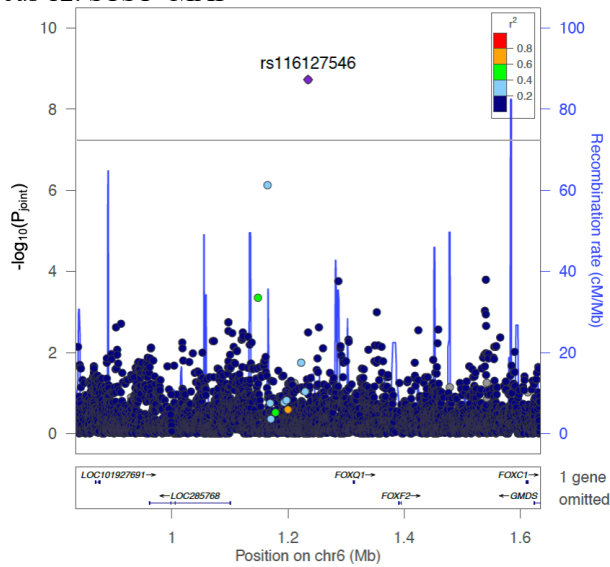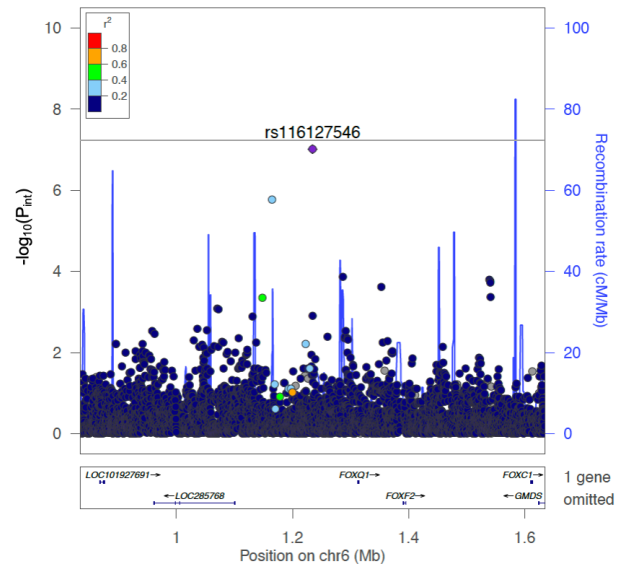



Locus 13. STST- PP

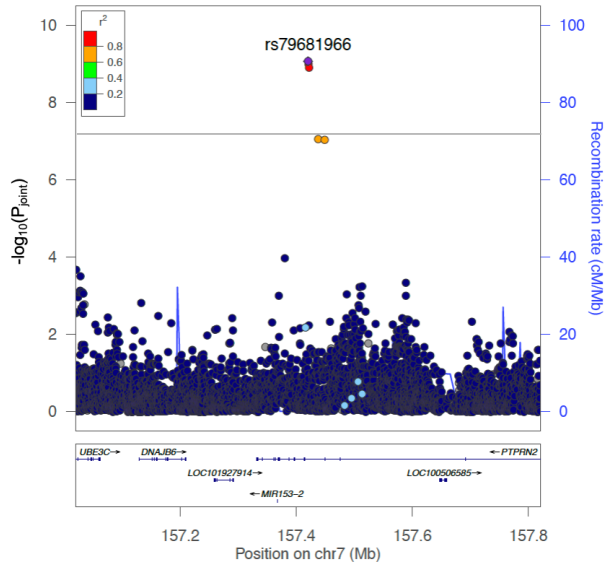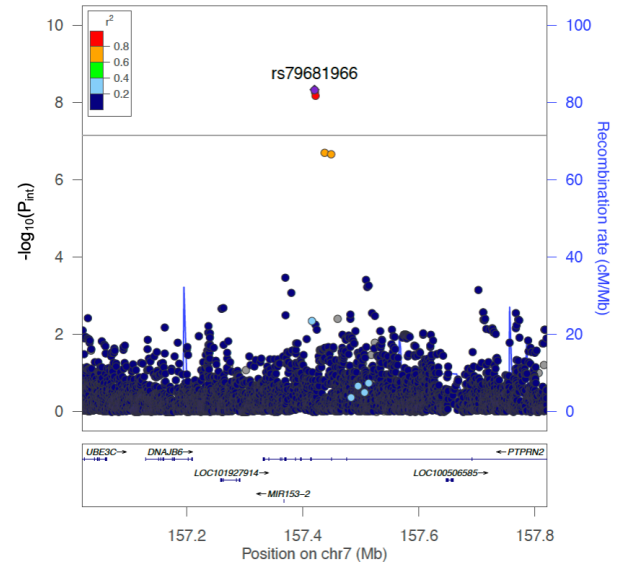

Locus 14. STST- SBP

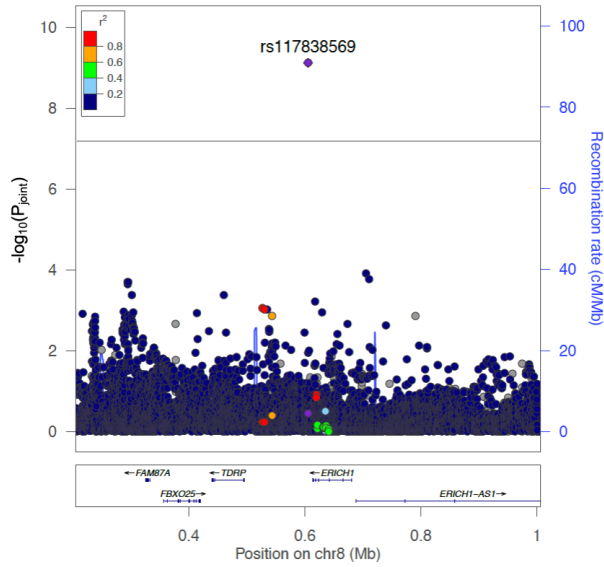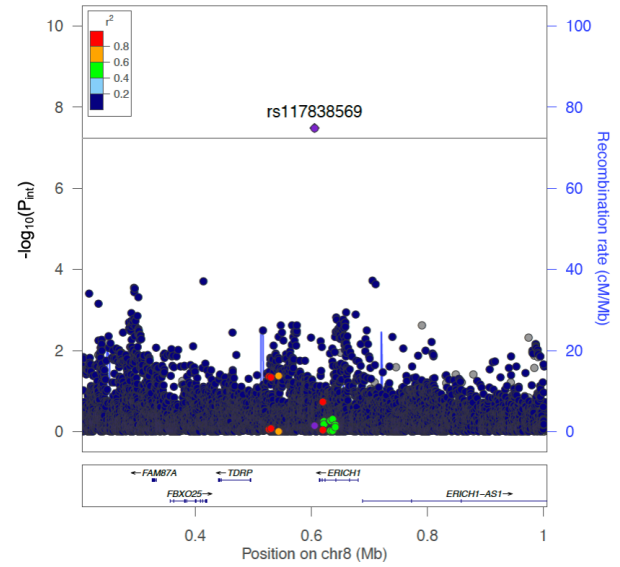

Locus 15. STST- DBP

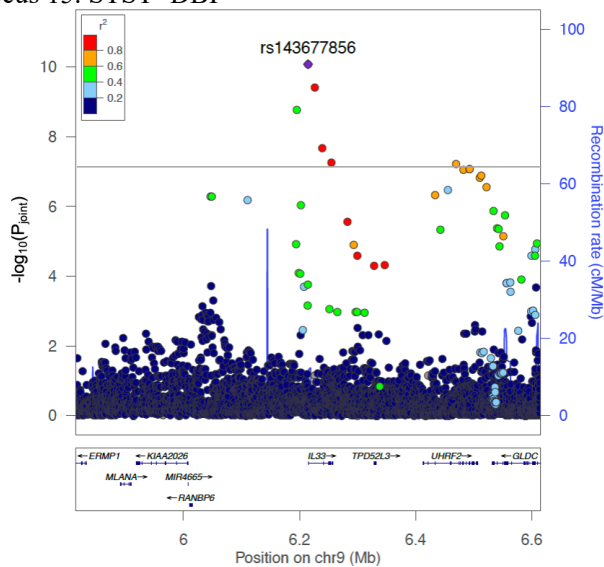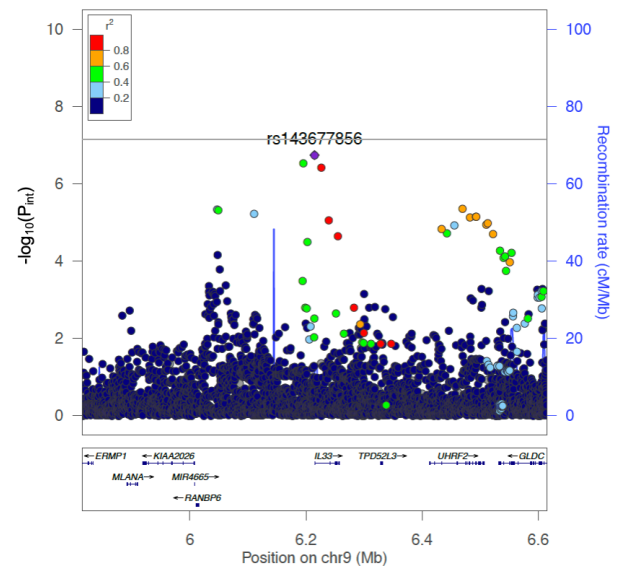



Locus 16. STST- MAP

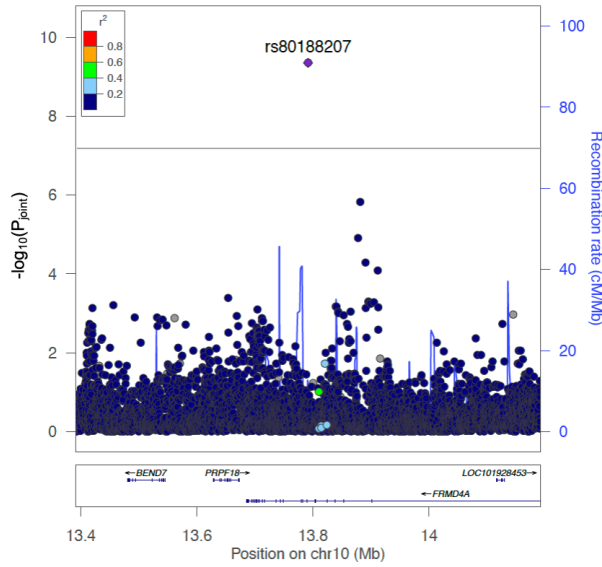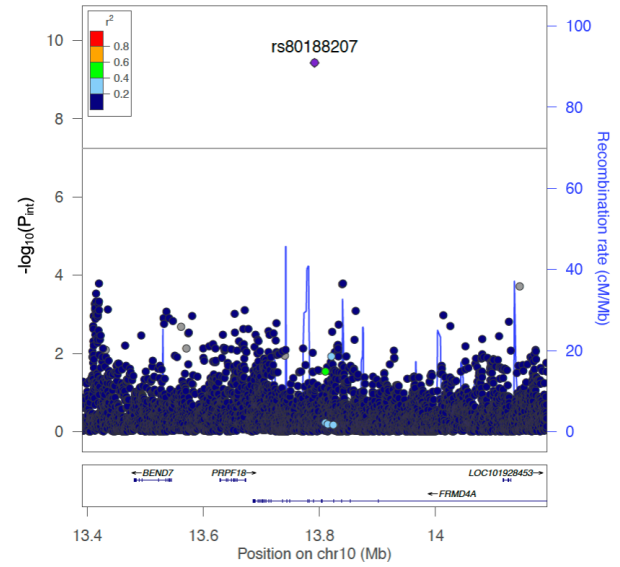

Locus 17. STST- PP

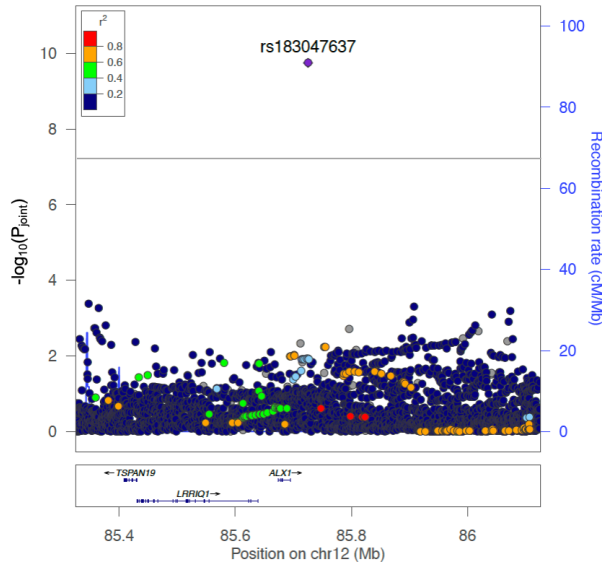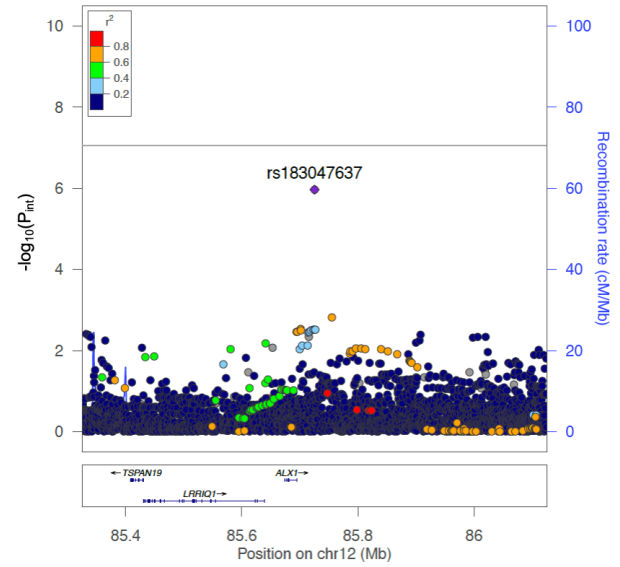

Locus 18. STST- DBP

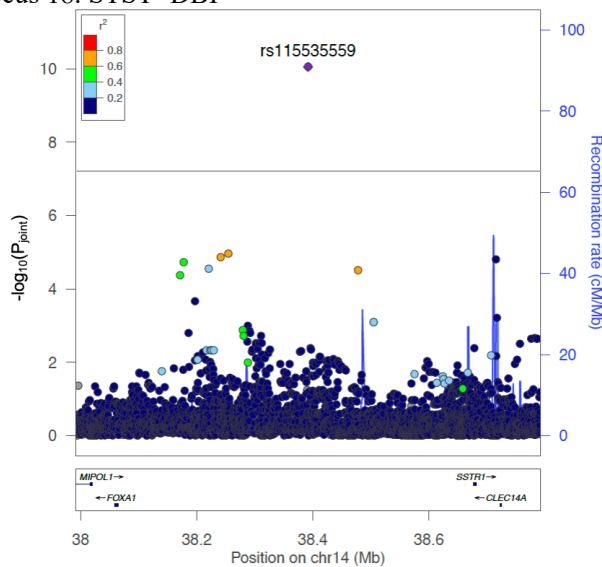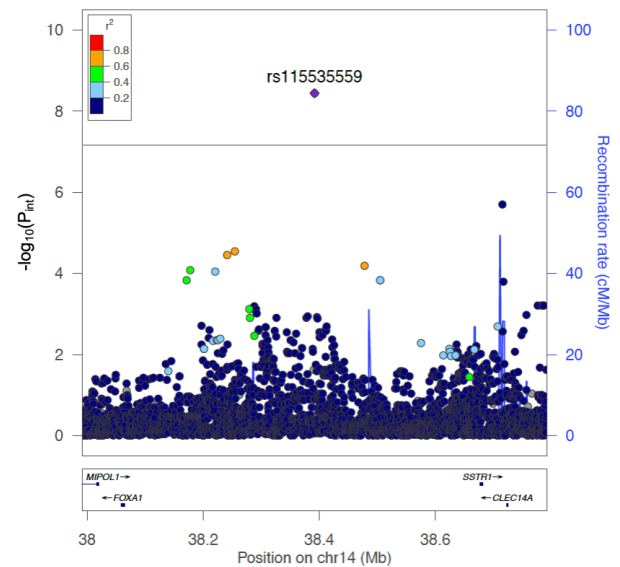

Locus 19. STST- SBP

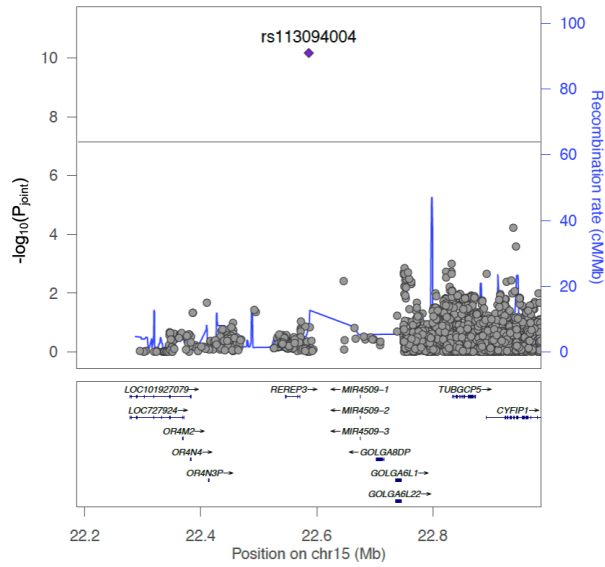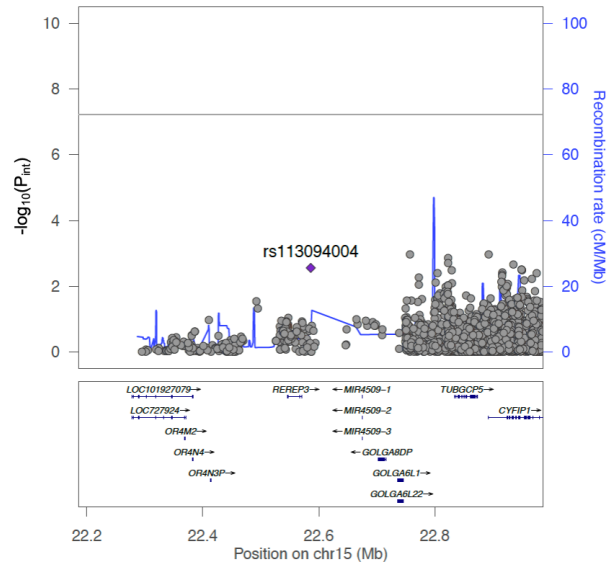

Locus 20. STST- PP

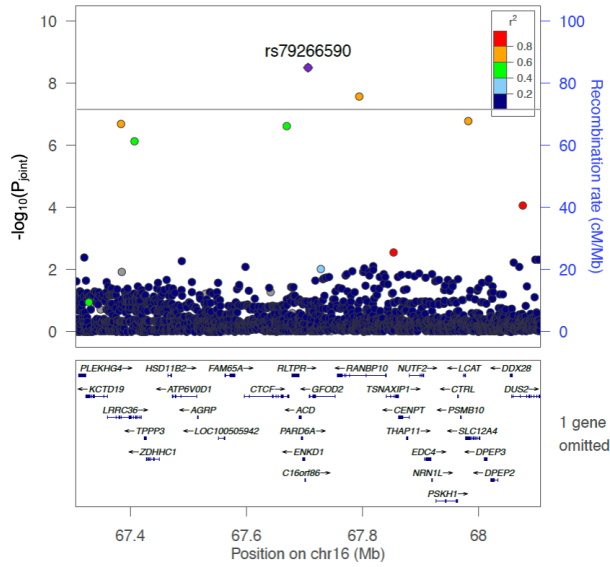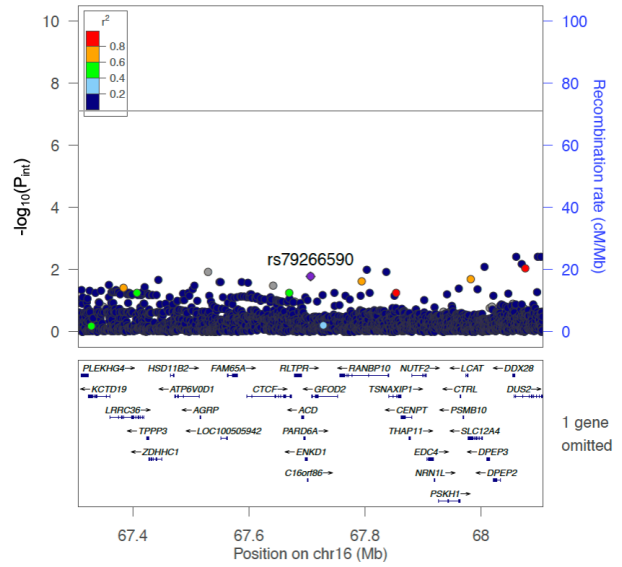

Supplement: NIHMS1692182-supplement-1692182_Supp_Fig1-13.pdf [file NIHMS1692182-supplement-1692182_Supp_Fig1-13.pdf]
